# Supplementary material
Source: PubMed Central journal article supplement (PMC5164921)

# A Scalable Synthesis of the Difluoromethyl-*allo*-threonyl hydroxamate-based LpxC Inhibitor LPC-058

Xiaofei Liang<sup>1</sup>, Ramesh Gopaldaswamy<sup>1\*</sup>, Frank Navas III<sup>1</sup>, Eric J.Toone<sup>1,2</sup>, Pei Zhou<sup>1,2\*</sup>

<sup>1</sup>Department of Chemistry, Duke University, Durham, NC, 27708, USA

<sup>2</sup>Department of Biochemistry, Duke University Medical Center, Durham, NC 27710, USA

## SUPPORTING INFORMATION

### Table of Contents

|                                                                                             |           |
|---------------------------------------------------------------------------------------------|-----------|
| X-ray crystal structure report for <b>11</b> .....                                          | <b>2</b>  |
| X-ray crystal structure report for <b>21</b> .....                                          | <b>10</b> |
| <sup>1</sup> H NMR spectrum for <b>16</b> .....                                             | <b>18</b> |
| <sup>1</sup> H, <sup>13</sup> C, <sup>19</sup> F NMR spectrum for <b>19 a &amp; b</b> ..... | <b>19</b> |
| <sup>1</sup> H, <sup>13</sup> C, <sup>19</sup> F NMR spectrum for <b>20a</b> .....          | <b>20</b> |
| <sup>1</sup> H, <sup>13</sup> C, <sup>19</sup> F NMR spectrum for <b>21</b> .....           | <b>22</b> |
| <sup>1</sup> H, <sup>13</sup> C, <sup>19</sup> F NMR spectrum for <b>12</b> .....           | <b>23</b> |
| <sup>1</sup> H, <sup>13</sup> C, <sup>19</sup> F NMR spectrum for <b>LPC-058</b> .....      | <b>25</b> |

## Crystal Structure Report for rds037 (Compound 11)

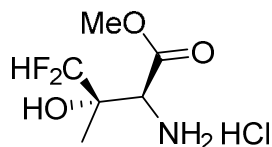

A colorless blade-like specimen of  $C_6H_{12}ClF_2NO_3$ , approximate dimensions 0.180 mm x 0.300 mm x 0.380 mm, was used for the X-ray crystallographic analysis. The X-ray intensity data were measured.

**Table 1: Data collection details for rds037 (Compound 11)**

| Axis  | dx/m<br>m | 2 $\theta$ / $^\circ$ | $\omega$ / $^\circ$ | $\phi$ / $^\circ$ | $\chi$ / $^\circ$ | Width/<br>$^\circ$ | Frames | Time/<br>s | Wavelength/ $\text{\AA}$ | Voltage/<br>kV | Current/<br>mA | Temperature/<br>K |
|-------|-----------|-----------------------|---------------------|-------------------|-------------------|--------------------|--------|------------|--------------------------|----------------|----------------|-------------------|
| Phi   | 38.143    | 24.74                 | 0.00                | -190.75           | 23.00             | 0.50               | 721    | 10.00      | 0.71073                  | 50             | 30.0           | n/a               |
| Omega | 38.143    | 52.96                 | -36.64              | -46.34            | 76.78             | 0.50               | 177    | 10.00      | 0.71073                  | 50             | 30.0           | n/a               |
| Omega | 38.143    | 56.39                 | -24.68              | -237.44           | 59.81             | 0.50               | 160    | 10.00      | 0.71073                  | 50             | 30.0           | n/a               |
| Omega | 38.143    | 54.43                 | -25.41              | -91.25            | 5.99              | 0.50               | 159    | 10.00      | 0.71073                  | 50             | 30.0           | n/a               |
| Omega | 38.143    | 55.46                 | -47.65              | -169.93           | 55.06             | 0.50               | 204    | 10.00      | 0.71073                  | 50             | 30.0           | n/a               |
| Omega | 38.143    | 52.71                 | -9.17               | -157.39           | 11.29             | 0.50               | 122    | 10.00      | 0.71073                  | 50             | 30.0           | n/a               |

A total of 1543 frames were collected. The total exposure time was 4.29 hours. The frames were integrated with the Bruker SAINT software package using a narrow-frame algorithm. The integration of the data using a monoclinic unit cell yielded a total of 17754 reflections to a maximum  $\theta$  angle of  $30.50^\circ$  ( $0.70 \text{ \AA}$  resolution), of which 5902 were independent (average redundancy 3.008, completeness = 100.0%,  $R_{\text{int}} = 2.71\%$ ,  $R_{\text{sig}} = 2.88\%$ ) and 5465 (92.60%) were greater than  $2\sigma(F^2)$ . The final cell constants of  $a = 12.4761(5) \text{ \AA}$ ,  $b = 5.4881(2) \text{ \AA}$ ,  $c = 14.5393(5) \text{ \AA}$ ,  $\beta = 103.817(2)^\circ$ , volume =  $966.70(6) \text{ \AA}^3$ , are based upon the refinement of the XYZ-centroids of 8013 reflections above  $20 \sigma(I)$  with  $6.655^\circ < 2\theta < 62.86^\circ$ . Data were corrected for absorption effects using the multi-scan method (SADABS). The ratio of minimum to maximum apparent transmission was 0.891. The calculated minimum and maximum transmission coefficients (based on crystal size) are 0.6652 and 0.7462.

The structure was solved and refined using the Bruker SHELXTL Software Package, using the space group P 1 21 1, with  $Z = 4$  for the formula unit,  $C_6H_{12}ClF_2NO_3$ . The final anisotropic full-matrix least-squares refinement on  $F^2$  with 243 variables converged at  $R1 = 2.67\%$ , for the observed data and  $wR2 = 6.75\%$  for all data. The goodness-of-fit was 1.037. The largest peak in the final difference electron density synthesis was  $0.393 \text{ e}^-/\text{\AA}^3$  and the largest hole was  $-0.261 \text{ e}^-/\text{\AA}^3$  with an RMS deviation of  $0.050 \text{ e}^-/\text{\AA}^3$ . On the basis of the final model, the calculated density was  $1.509 \text{ g/cm}^3$  and  $F(000)$ , 456  $e^-$ .

**Table 2. Sample and crystal data for rds037.**

|                     |                          |
|---------------------|--------------------------|
| Identification code | rds037                   |
| Chemical formula    | $C_6H_{12}ClF_2NO_3$     |
| Formula weight      | 219.62                   |
| Temperature         | 110(2) K                 |
| Wavelength          | 0.71073 $\text{\AA}$     |
| Crystal size        | 0.180 x 0.300 x 0.380 mm |

|                               |                          |                            |
|-------------------------------|--------------------------|----------------------------|
| <b>Crystal habit</b>          | colorless blade          |                            |
| <b>Crystal system</b>         | monoclinic               |                            |
| <b>Space group</b>            | P 1 21 1                 |                            |
| <b>Unit cell dimensions</b>   | a = 12.4761(5) Å         | $\alpha = 90^\circ$        |
|                               | b = 5.4881(2) Å          | $\beta = 103.817(2)^\circ$ |
|                               | c = 14.5393(5) Å         | $\gamma = 90^\circ$        |
| <b>Volume</b>                 | 966.70(6) Å <sup>3</sup> |                            |
| <b>Z</b>                      | 4                        |                            |
| <b>Density (calculated)</b>   | 1.509 g/cm <sup>3</sup>  |                            |
| <b>Absorption coefficient</b> | 0.403 mm <sup>-1</sup>   |                            |
| <b>F(000)</b>                 | 456                      |                            |

**Table 3. Data collection and structure refinement for rds037.**

|                                            |                                                                                                                                                                       |                           |
|--------------------------------------------|-----------------------------------------------------------------------------------------------------------------------------------------------------------------------|---------------------------|
| <b>Theta range for data collection</b>     | 1.44 to 30.50°                                                                                                                                                        |                           |
| <b>Index ranges</b>                        | -16 ≤ h ≤ 17, -7 ≤ k ≤ 7, -18 ≤ l ≤ 20                                                                                                                                |                           |
| <b>Reflections collected</b>               | 17754                                                                                                                                                                 |                           |
| <b>Independent reflections</b>             | 5902 [R(int) = 0.0271]                                                                                                                                                |                           |
| <b>Coverage of independent reflections</b> | 100.0%                                                                                                                                                                |                           |
| <b>Absorption correction</b>               | multi-scan                                                                                                                                                            |                           |
| <b>Max. and min. transmission</b>          | 0.7462 and 0.6652                                                                                                                                                     |                           |
| <b>Structure solution technique</b>        | direct methods                                                                                                                                                        |                           |
| <b>Structure solution program</b>          | SHELXS-97 (Sheldrick, 2008)                                                                                                                                           |                           |
| <b>Refinement method</b>                   | Full-matrix least-squares on F <sup>2</sup>                                                                                                                           |                           |
| <b>Refinement program</b>                  | SHELXL-97 (Sheldrick, 2008)                                                                                                                                           |                           |
| <b>Function minimized</b>                  | $\Sigma w(F_o^2 - F_c^2)^2$                                                                                                                                           |                           |
| <b>Data / restraints / parameters</b>      | 5902 / 1 / 243                                                                                                                                                        |                           |
| <b>Goodness-of-fit on F<sup>2</sup></b>    | 1.037                                                                                                                                                                 |                           |
| <b><math>\Delta/\sigma_{\max}</math></b>   | 0.001                                                                                                                                                                 |                           |
| <b>Final R indices</b>                     | 5465                                                                                                                                                                  |                           |
|                                            | data;                                                                                                                                                                 | R1 = 0.0267, wR2 = 0.0654 |
|                                            | I > 2σ(I)                                                                                                                                                             |                           |
|                                            | all data                                                                                                                                                              | R1 = 0.0305, wR2 = 0.0675 |
| <b>Weighting scheme</b>                    | w = 1/[σ <sup>2</sup> (F <sub>o</sub> <sup>2</sup> ) + (0.0361P) <sup>2</sup> + 0.1095P]<br>where P = (F <sub>o</sub> <sup>2</sup> + 2F <sub>c</sub> <sup>2</sup> )/3 |                           |
| <b>Absolute structure parameter</b>        | 0.0(0)                                                                                                                                                                |                           |
| <b>Largest diff. peak and hole</b>         | 0.393 and -0.261 eÅ <sup>-3</sup>                                                                                                                                     |                           |
| <b>R.M.S. deviation from mean</b>          | 0.050 eÅ <sup>-3</sup>                                                                                                                                                |                           |

**Table 4. Atomic coordinates and equivalent isotropic atomic displacement parameters ( $\text{\AA}^2$ ) for rds037.**

U(eq) is defined as one third of the trace of the orthogonalized  $U_{ij}$  tensor.

|     | x/a         | y/b         | z/c          | U(eq)       |
|-----|-------------|-------------|--------------|-------------|
| Cl1 | 0.77524(2)  | 0.85891(6)  | 0.41563(2)   | 0.01896(7)  |
| Cl2 | 0.68987(2)  | 0.35823(6)  | 0.106275(19) | 0.01829(7)  |
| F1  | 0.10368(7)  | 0.57067(17) | 0.22751(6)   | 0.02596(19) |
| F2  | 0.22715(6)  | 0.40278(17) | 0.34101(6)   | 0.02516(19) |
| O1  | 0.85325(7)  | 0.91040(17) | 0.21090(7)   | 0.01707(19) |
| O2  | 0.95416(8)  | 0.11068(19) | 0.12578(7)   | 0.01927(19) |
| O3  | 0.03998(7)  | 0.47692(17) | 0.39956(7)   | 0.01473(17) |
| N1  | 0.84034(8)  | 0.3224(2)   | 0.31514(7)   | 0.01345(19) |
| C1  | 0.90478(9)  | 0.0861(2)   | 0.19684(9)   | 0.0137(2)   |
| C2  | 0.92743(9)  | 0.3070(2)   | 0.26175(9)   | 0.0126(2)   |
| C3  | 0.04253(10) | 0.2941(2)   | 0.33194(9)   | 0.0128(2)   |
| C4  | 0.12989(9)  | 0.3588(3)   | 0.27747(9)   | 0.0184(2)   |
| C5  | 0.93615(14) | 0.9121(3)   | 0.05807(10)  | 0.0273(3)   |
| C6  | 0.06856(11) | 0.0441(2)   | 0.37675(10)  | 0.0192(3)   |
| F3  | 0.23110(6)  | 0.88177(19) | 0.12623(6)   | 0.02647(19) |
| F4  | 0.33468(7)  | 0.06900(18) | 0.24767(6)   | 0.0277(2)   |
| O4  | 0.59998(8)  | 0.41591(17) | 0.30488(7)   | 0.01784(19) |
| O5  | 0.47357(8)  | 0.60423(18) | 0.36726(7)   | 0.01769(18) |
| O6  | 0.43628(7)  | 0.97991(16) | 0.09908(6)   | 0.01429(18) |
| N2  | 0.62538(8)  | 0.8270(2)   | 0.20443(7)   | 0.0135(2)   |
| C7  | 0.53994(9)  | 0.5861(2)   | 0.30846(8)   | 0.0136(2)   |
| C8  | 0.52694(9)  | 0.8073(2)   | 0.24406(9)   | 0.0124(2)   |
| C9  | 0.42134(10) | 0.7932(2)   | 0.16107(9)   | 0.0123(2)   |
| C10 | 0.32062(9)  | 0.8513(3)   | 0.20034(9)   | 0.0184(2)   |
| C11 | 0.47854(12) | 0.4008(3)   | 0.43224(9)   | 0.0217(3)   |
| C12 | 0.40499(11) | 0.5442(2)   | 0.11444(10)  | 0.0181(3)   |

**Table 5. Bond lengths ( $\text{\AA}$ ) for rds037.**

|        |            |        |            |
|--------|------------|--------|------------|
| F1-C4  | 1.3685(17) | F2-C4  | 1.3596(14) |
| O1-C1  | 1.2032(16) | O2-C1  | 1.3300(15) |
| O2-C5  | 1.4499(17) | O3-C3  | 1.4105(15) |
| O3-H3  | 0.84       | N1-C2  | 1.4809(15) |
| N1-H1A | 0.91       | N1-H1B | 0.91       |
| N1-H1C | 0.91       | C1-C2  | 1.5209(17) |
| C2-C3  | 1.5520(16) | C2-H2  | 1.0        |

|          |            |          |            |
|----------|------------|----------|------------|
| C3-C6    | 1.5203(17) | C3-C4    | 1.5341(17) |
| C4-H4    | 1.0        | C5-H5A   | 0.98       |
| C5-H5B   | 0.98       | C5-H5C   | 0.98       |
| C6-H6A   | 0.98       | C6-H6B   | 0.98       |
| C6-H6C   | 0.98       | F3-C10   | 1.3644(14) |
| F4-C10   | 1.3690(18) | O4-C7    | 1.2061(15) |
| O5-C7    | 1.3284(15) | O5-C11   | 1.4541(16) |
| O6-C9    | 1.4061(14) | O6-H6    | 0.84       |
| N2-C8    | 1.4798(15) | N2-H2A   | 0.91       |
| N2-H2B   | 0.91       | N2-H2C   | 0.91       |
| C7-C8    | 1.5180(17) | C8-C9    | 1.5615(16) |
| C8-H8    | 1.0        | C9-C12   | 1.5172(17) |
| C9-C10   | 1.5328(17) | C10-H10  | 1.0        |
| C11-H11A | 0.98       | C11-H11B | 0.98       |
| C11-H11C | 0.98       | C12-H12A | 0.98       |
| C12-H12B | 0.98       | C12-H12C | 0.98       |

**Table 6. Bond angles (°) for rds037.**

|            |            |            |            |
|------------|------------|------------|------------|
| C1-O2-C5   | 115.20(11) | C3-O3-H3   | 109.5      |
| C2-N1-H1A  | 109.5      | C2-N1-H1B  | 109.5      |
| H1A-N1-H1B | 109.5      | C2-N1-H1C  | 109.5      |
| H1A-N1-H1C | 109.5      | H1B-N1-H1C | 109.5      |
| O1-C1-O2   | 125.36(12) | O1-C1-C2   | 124.13(11) |
| O2-C1-C2   | 110.44(10) | N1-C2-C1   | 108.65(9)  |
| N1-C2-C3   | 109.72(10) | C1-C2-C3   | 112.16(10) |
| N1-C2-H2   | 108.8      | C1-C2-H2   | 108.8      |
| C3-C2-H2   | 108.8      | O3-C3-C6   | 112.42(10) |
| O3-C3-C4   | 109.39(10) | C6-C3-C4   | 108.96(11) |
| O3-C3-C2   | 104.74(9)  | C6-C3-C2   | 113.11(10) |
| C4-C3-C2   | 108.05(10) | F2-C4-F1   | 105.74(11) |
| F2-C4-C3   | 108.62(10) | F1-C4-C3   | 111.21(10) |
| F2-C4-H4   | 110.4      | F1-C4-H4   | 110.4      |
| C3-C4-H4   | 110.4      | O2-C5-H5A  | 109.5      |
| O2-C5-H5B  | 109.5      | H5A-C5-H5B | 109.5      |
| O2-C5-H5C  | 109.5      | H5A-C5-H5C | 109.5      |
| H5B-C5-H5C | 109.5      | C3-C6-H6A  | 109.5      |
| C3-C6-H6B  | 109.5      | H6A-C6-H6B | 109.5      |
| C3-C6-H6C  | 109.5      | H6A-C6-H6C | 109.5      |
| H6B-C6-H6C | 109.5      | C7-O5-C11  | 115.10(10) |

|               |            |               |            |
|---------------|------------|---------------|------------|
| C9-O6-H6      | 109.5      | C8-N2-H2A     | 109.5      |
| C8-N2-H2B     | 109.5      | H2A-N2-H2B    | 109.5      |
| C8-N2-H2C     | 109.5      | H2A-N2-H2C    | 109.5      |
| H2B-N2-H2C    | 109.5      | O4-C7-O5      | 125.09(12) |
| O4-C7-C8      | 124.65(11) | O5-C7-C8      | 110.23(10) |
| N2-C8-C7      | 108.79(9)  | N2-C8-C9      | 109.17(10) |
| C7-C8-C9      | 112.53(9)  | N2-C8-H8      | 108.8      |
| C7-C8-H8      | 108.8      | C9-C8-H8      | 108.8      |
| O6-C9-C12     | 113.21(10) | O6-C9-C10     | 109.45(10) |
| C12-C9-C10    | 108.60(11) | O6-C9-C8      | 104.04(9)  |
| C12-C9-C8     | 112.86(10) | C10-C9-C8     | 108.50(10) |
| F3-C10-F4     | 105.81(11) | F3-C10-C9     | 108.70(10) |
| F4-C10-C9     | 110.54(10) | F3-C10-H10    | 110.6      |
| F4-C10-H10    | 110.6      | C9-C10-H10    | 110.6      |
| O5-C11-H11A   | 109.5      | O5-C11-H11B   | 109.5      |
| H11A-C11-H11B | 109.5      | O5-C11-H11C   | 109.5      |
| H11A-C11-H11C | 109.5      | H11B-C11-H11C | 109.5      |
| C9-C12-H12A   | 109.5      | C9-C12-H12B   | 109.5      |
| H12A-C12-H12B | 109.5      | C9-C12-H12C   | 109.5      |
| H12A-C12-H12C | 109.5      | H12B-C12-H12C | 109.5      |

**Table 7. Torsion angles (°) for rds037.**

|               |             |               |             |
|---------------|-------------|---------------|-------------|
| C5-O2-C1-O1   | 4.25(18)    | C5-O2-C1-C2   | -178.75(11) |
| O1-C1-C2-N1   | -24.87(16)  | O2-C1-C2-N1   | 158.08(10)  |
| O1-C1-C2-C3   | 96.59(14)   | O2-C1-C2-C3   | -80.46(12)  |
| N1-C2-C3-O3   | -45.94(12)  | C1-C2-C3-O3   | -166.78(10) |
| N1-C2-C3-C6   | 76.82(13)   | C1-C2-C3-C6   | -44.02(15)  |
| N1-C2-C3-C4   | -162.47(10) | C1-C2-C3-C4   | 76.68(13)   |
| O3-C3-C4-F2   | 52.78(14)   | C6-C3-C4-F2   | -70.48(14)  |
| C2-C3-C4-F2   | 166.26(11)  | O3-C3-C4-F1   | -63.17(12)  |
| C6-C3-C4-F1   | 173.56(10)  | C2-C3-C4-F1   | 50.30(13)   |
| C11-O5-C7-O4  | 1.38(17)    | C11-O5-C7-C8  | 179.65(10)  |
| O4-C7-C8-N2   | -21.37(16)  | O5-C7-C8-N2   | 160.35(9)   |
| O4-C7-C8-C9   | 99.73(14)   | O5-C7-C8-C9   | -78.55(12)  |
| N2-C8-C9-O6   | -46.42(12)  | C7-C8-C9-O6   | -167.31(10) |
| N2-C8-C9-C12  | 76.70(13)   | C7-C8-C9-C12  | -44.19(14)  |
| N2-C8-C9-C10  | -162.89(10) | C7-C8-C9-C10  | 76.22(13)   |
| O6-C9-C10-F3  | 56.46(14)   | C12-C9-C10-F3 | -67.59(14)  |
| C8-C9-C10-F3  | 169.39(11)  | O6-C9-C10-F4  | -59.26(13)  |
| C12-C9-C10-F4 | 176.69(10)  | C8-C9-C10-F4  | 53.67(13)   |

**Table 8. Anisotropic atomic displacement parameters ( $\text{\AA}^2$ ) for rds037.**

The anisotropic atomic displacement factor exponent takes the form:  $-2\pi^2 [ h^2 a^{*2} U_{11} + \dots + 2 h k a^* b^* U_{12} ]$

|     | $U_{11}$    | $U_{22}$    | $U_{33}$    | $U_{23}$    | $U_{13}$     | $U_{12}$     |
|-----|-------------|-------------|-------------|-------------|--------------|--------------|
| Cl1 | 0.01898(13) | 0.01959(14) | 0.01566(12) | 0.00305(13) | -0.00110(10) | -0.00442(13) |
| Cl2 | 0.01859(12) | 0.01909(14) | 0.01464(12) | 0.00249(13) | -0.00109(9)  | 0.00448(13)  |
| F1  | 0.0235(4)   | 0.0252(4)   | 0.0307(5)   | 0.0073(4)   | 0.0094(3)    | -0.0052(4)   |
| F2  | 0.0118(3)   | 0.0320(5)   | 0.0303(4)   | -0.0068(4)  | 0.0024(3)    | -0.0051(3)   |
| O1  | 0.0161(4)   | 0.0133(4)   | 0.0216(4)   | -0.0028(3)  | 0.0041(3)    | -0.0025(3)   |
| O2  | 0.0240(5)   | 0.0179(5)   | 0.0171(4)   | -0.0034(4)  | 0.0071(4)    | -0.0029(4)   |
| O3  | 0.0148(4)   | 0.0112(4)   | 0.0160(4)   | -0.0036(3)  | -0.0008(3)   | 0.0019(3)    |
| N1  | 0.0120(4)   | 0.0119(5)   | 0.0158(4)   | -0.0012(4)  | 0.0020(3)    | 0.0001(4)    |
| C1  | 0.0116(5)   | 0.0137(5)   | 0.0145(5)   | -0.0010(5)  | 0.0005(4)    | 0.0020(4)    |
| C2  | 0.0114(5)   | 0.0110(6)   | 0.0151(5)   | 0.0003(4)   | 0.0024(4)    | -0.0002(4)   |
| C3  | 0.0112(5)   | 0.0099(5)   | 0.0163(5)   | -0.0018(4)  | 0.0011(4)    | -0.0001(4)   |
| C4  | 0.0129(5)   | 0.0195(6)   | 0.0225(5)   | -0.0011(6)  | 0.0035(4)    | -0.0010(5)   |
| C5  | 0.0387(8)   | 0.0248(8)   | 0.0190(6)   | -0.0087(6)  | 0.0084(6)    | -0.0006(6)   |
| C6  | 0.0185(6)   | 0.0109(6)   | 0.0244(7)   | 0.0007(5)   | -0.0022(5)   | 0.0021(4)    |
| F3  | 0.0124(3)   | 0.0355(5)   | 0.0288(4)   | 0.0072(4)   | -0.0004(3)   | 0.0040(4)    |
| F4  | 0.0238(4)   | 0.0283(5)   | 0.0320(5)   | -0.0074(4)  | 0.0085(4)    | 0.0078(4)    |
| O4  | 0.0184(4)   | 0.0133(4)   | 0.0207(4)   | 0.0033(3)   | 0.0026(3)    | 0.0027(3)    |
| O5  | 0.0220(4)   | 0.0165(5)   | 0.0148(4)   | 0.0032(4)   | 0.0049(3)    | 0.0012(4)    |
| O6  | 0.0161(4)   | 0.0101(4)   | 0.0144(4)   | 0.0028(3)   | -0.0010(3)   | -0.0024(3)   |
| N2  | 0.0115(4)   | 0.0123(5)   | 0.0156(4)   | 0.0011(4)   | 0.0010(3)    | -0.0011(4)   |
| C7  | 0.0132(5)   | 0.0133(5)   | 0.0123(5)   | -0.0005(4)  | -0.0009(4)   | -0.0019(4)   |
| C8  | 0.0119(5)   | 0.0100(6)   | 0.0145(5)   | 0.0000(4)   | 0.0017(4)    | -0.0004(4)   |
| C9  | 0.0113(5)   | 0.0092(5)   | 0.0149(5)   | 0.0017(4)   | 0.0002(4)    | -0.0005(4)   |
| C10 | 0.0126(5)   | 0.0213(6)   | 0.0207(5)   | 0.0026(6)   | 0.0027(4)    | 0.0010(5)    |
| C11 | 0.0301(7)   | 0.0191(7)   | 0.0153(6)   | 0.0057(5)   | 0.0043(5)    | -0.0030(5)   |
| C12 | 0.0178(5)   | 0.0100(6)   | 0.0225(6)   | -0.0017(5)  | -0.0034(5)   | -0.0015(5)   |

**Table 9. Hydrogen atomic coordinates and isotropic atomic displacement parameters ( $\text{\AA}^2$ ) for rds037.**

|    | x/a    | y/b    | z/c    | U(eq) |
|----|--------|--------|--------|-------|
| H3 | 1.0908 | 0.4523 | 0.4481 | 0.022 |

|      | x/a    | y/b     | z/c    | U(eq) |
|------|--------|---------|--------|-------|
| H1A  | 0.8562 | 0.4461  | 0.3579 | 0.016 |
| H1B  | 0.8372 | 0.1794  | 0.3461 | 0.016 |
| H1C  | 0.7740 | 0.3511  | 0.2742 | 0.016 |
| H2   | 0.9241 | 0.4569  | 0.2220 | 0.015 |
| H4   | 1.1385 | 0.2226  | 0.2341 | 0.022 |
| H5A  | 0.9589 | -0.2417 | 0.0913 | 0.041 |
| H5B  | 0.9797 | -0.0600 | 0.0112 | 0.041 |
| H5C  | 0.8577 | -0.0963 | 0.0260 | 0.041 |
| H6A  | 1.1397 | 0.0497  | 0.4233 | 0.029 |
| H6B  | 1.0722 | -0.0755 | 0.3275 | 0.029 |
| H6C  | 1.0105 | -0.0032 | 0.4083 | 0.029 |
| H6   | 0.3957 | 0.9537  | 0.0450 | 0.021 |
| H2A  | 0.6864 | 0.8504  | 0.2523 | 0.016 |
| H2B  | 0.6170 | 0.9553  | 0.1637 | 0.016 |
| H2C  | 0.6332 | 0.6873  | 0.1729 | 0.016 |
| H8   | 0.5223 | 0.9564  | 0.2825 | 0.015 |
| H10  | 0.3071 | 0.7174  | 0.2428 | 0.022 |
| H11A | 0.4263 | 0.4283  | 0.4719 | 0.032 |
| H11B | 0.5534 | 0.3872  | 0.4725 | 0.032 |
| H11C | 0.4592 | 0.2499  | 0.3961 | 0.032 |
| H12A | 0.3431 | 0.5508  | 0.0585 | 0.027 |
| H12B | 0.3891 | 0.4244  | 0.1594 | 0.027 |
| H12C | 0.4723 | 0.4967  | 0.0954 | 0.027 |

**Table 10. Hydrogen bond distances (Å) and angles (°) for rds037.**

|                       | Donor-<br>H | Acceptor-<br>H | Donor-<br>Acceptor | Angle |
|-----------------------|-------------|----------------|--------------------|-------|
| O3-H3 $\cdots$ Cl1#3  | 0.84        | 2.32           | 3.1617(9)          | 175.9 |
| N1-H1A $\cdots$ Cl1#1 | 0.91        | 2.70           | 3.4687(11)         | 143.4 |
| N1-H1B $\cdots$ Cl1   | 0.91        | 2.26           | 3.1354(11)         | 162.5 |
| N1-H1C $\cdots$ O4    | 0.91        | 2.35           | 3.0107(13)         | 129.8 |
| N1-H1C $\cdots$ Cl2   | 0.91        | 2.42           | 3.1720(10)         | 140.5 |
| O6-H6 $\cdots$ Cl2#2  | 0.84        | 2.26           | 3.0973(9)          | 171.1 |
| N2-H2A $\cdots$ O1#1  | 0.91        | 2.32           | 2.8589(13)         | 117.4 |
| N2-H2A $\cdots$ Cl1#1 | 0.91        | 2.37           | 3.1958(10)         | 151.1 |
| N2-H2B $\cdots$ Cl2#1 | 0.91        | 2.60           | 3.4254(11)         | 150.7 |



Symmetry transformations used to generate equivalent atoms:

#1  $x, y+1, z$

#2  $-x+1, y+1/2, -z$

#3  $-x+2, y+1/2, -z+1$

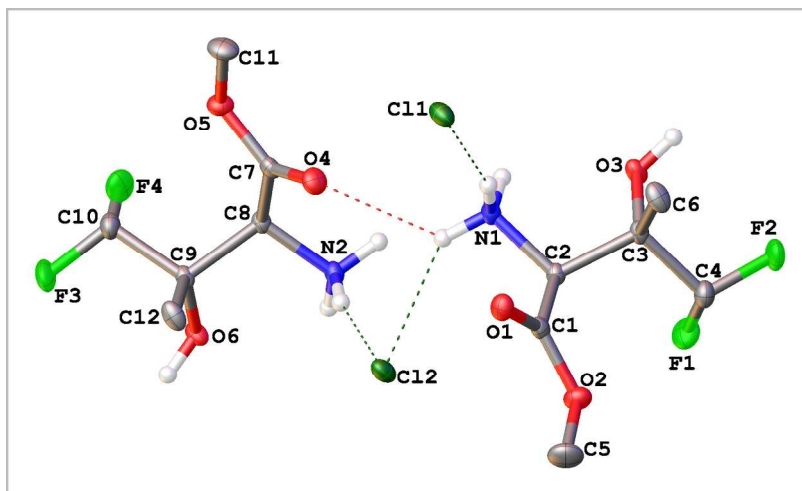

Figure A. Thermal Ellipsoid plot of rds037 drawn at 50% probability. H atoms on carbon are removed for clarity.

Figure B. Packing diagram of rds037 viewed along a axis of unit cell, showing hydrogen bond interactions with neighboring sulfonate anions. Only hydrogen bond donor and acceptor atoms labeled.

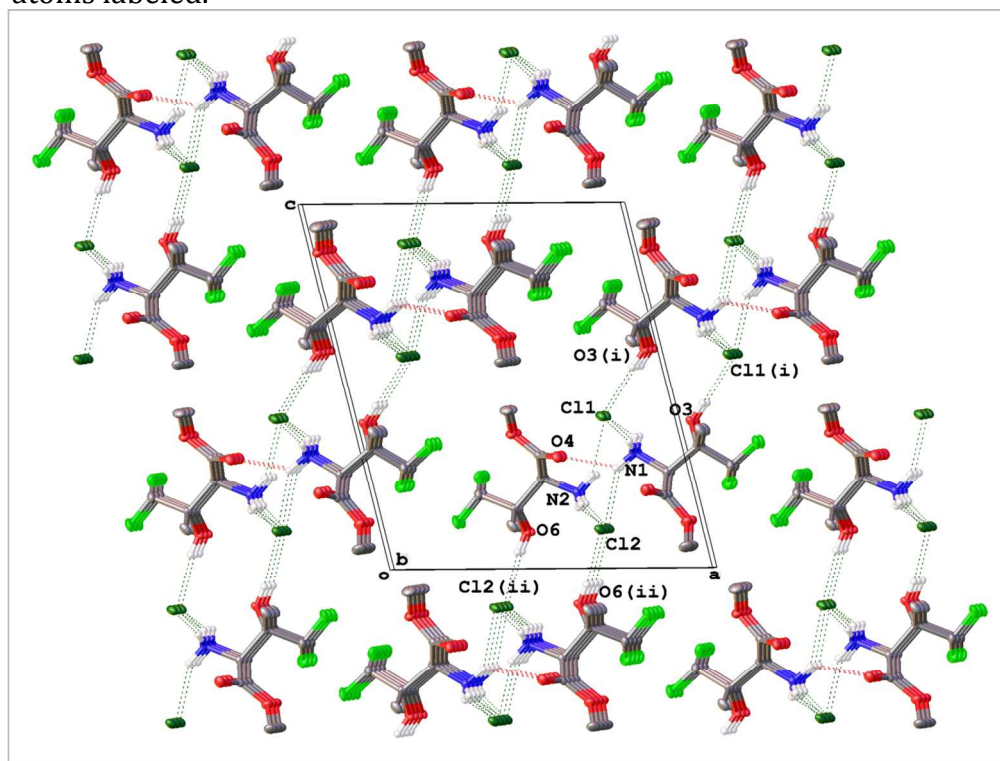

Ellipsoids drawn at 50% probability. H atoms on carbon are removed and O5(i) label excluded for clarity. (Symmetry operations i:  $2-x, \frac{1}{2} + y, 1-z$ ; ii:  $1-x, \frac{1}{2} + y, -z$ )

## Crystal Structure Report for rds041 (Compound 21)

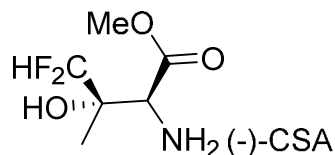

A colorless rod-like specimen of C<sub>16</sub>H<sub>27</sub>F<sub>2</sub>NO<sub>7</sub>S, approximate dimensions 0.070 mm x 0.070 mm x 0.340 mm, was used for the X-ray crystallographic analysis. The X-ray intensity data were measured.

**Table 1: Data collection details for rds041 (Compound 21).**

| Axis  | dx/m<br>m | 2θ/°               | ω/°                | φ/°     | χ/°                | Width/<br>° | Frames | Time<br>s | Wavelength<br>Å | Voltage<br>kV | Current<br>/ mA | T/<br>K |
|-------|-----------|--------------------|--------------------|---------|--------------------|-------------|--------|-----------|-----------------|---------------|-----------------|---------|
| Phi   | 38.160    | 25.79              | 0.00               | -172.00 | 23.00              | 0.50        | 622    | 30.00     | 0.71073         | 50            | 30.0            | n/a     |
| Omega | 38.160    | 53.74              | <sup>-</sup> 50.39 | 84.58   | 64.98              | 0.50        | 206    | 30.00     | 0.71073         | 50            | 30.0            | n/a     |
| Omega | 38.160    | <sup>-</sup> 62.69 | <sup>-</sup> 61.82 | -77.83  | <sup>-</sup> 14.56 | 0.50        | 165    | 30.00     | 0.71073         | 50            | 30.0            | n/a     |
| Omega | 38.160    | 62.43              | <sup>-</sup> 21.38 | 28.70   | 15.40              | 0.50        | 166    | 30.00     | 0.71073         | 50            | 30.0            | n/a     |
| Omega | 38.160    | <sup>-</sup> 56.38 | <sup>-</sup> 55.44 | -146.33 | <sup>-</sup> 54.46 | 0.50        | 204    | 30.00     | 0.71073         | 50            | 30.0            | n/a     |
| Omega | 38.160    | <sup>-</sup> 15.43 | -9.26              | -135.04 | <sup>-</sup> 80.56 | 0.50        | 63     | 30.00     | 0.71073         | 50            | 30.0            | n/a     |
| Omega | 38.160    | 60.99              | <sup>-</sup> 43.63 | -78.37  | 57.56              | 0.50        | 207    | 30.00     | 0.71073         | 50            | 30.0            | n/a     |

A total of 1633 frames were collected. The total exposure time was 13.61 hours. The frames were integrated with the Bruker SAINT software package using a narrow-frame algorithm. The integration of the data using an orthorhombic unit cell yielded a total of 27049 reflections to a maximum θ angle of 27.40° (0.77 Å resolution), of which 4195 were independent (average redundancy 6.448, completeness = 99.6%, R<sub>int</sub> = 6.06%, R<sub>sig</sub> = 3.57%) and 3755 (89.51%) were greater than 2σ(F<sup>2</sup>). The final cell constants of *a* = 6.3347(2) Å, *b* = 12.7819(4) Å, *c* = 22.8824(7) Å, volume = 1852.78(10) Å<sup>3</sup>, are based upon the refinement of the XYZ-centroids of 4987 reflections above 20 σ(I) with 4.778° < 2θ < 53.48°. Data were corrected for absorption effects using the multi-scan method (SADABS). The ratio of minimum to maximum apparent transmission was 0.857. The calculated minimum and maximum transmission coefficients (based on crystal size) are 0.6387 and 0.7455.

The structure was solved and refined using the Bruker SHELXTL Software Package, using the space group P 21 21 21, with Z = 4 for the formula unit, C<sub>16</sub>H<sub>27</sub>F<sub>2</sub>NO<sub>7</sub>S. The final anisotropic full-matrix least-squares refinement on F<sup>2</sup> with 250 variables converged at R1 = 3.03%, for the observed data and wR2 = 7.08% for all data. The goodness-of-fit was 1.024. The largest peak in the final difference electron density synthesis was 0.286 e<sup>-</sup>/Å<sup>3</sup> and the largest hole was -0.278 e<sup>-</sup>/Å<sup>3</sup> with an RMS deviation of 0.046 e<sup>-</sup>/Å<sup>3</sup>. On the basis of the final model, the calculated density was 1.489 g/cm<sup>3</sup> and F(000), 880 e<sup>-</sup>.

**Table 2. Sample and crystal data for rds041.**

|                               |                                                                  |         |
|-------------------------------|------------------------------------------------------------------|---------|
| <b>Identification code</b>    | rds041                                                           |         |
| <b>Chemical formula</b>       | C <sub>16</sub> H <sub>27</sub> F <sub>2</sub> NO <sub>7</sub> S |         |
| <b>Formula weight</b>         | 415.45                                                           |         |
| <b>Wavelength</b>             | 0.71073 Å                                                        |         |
| <b>Crystal size</b>           | 0.070 x 0.070 x 0.340 mm                                         |         |
| <b>Crystal habit</b>          | colorless rod                                                    |         |
| <b>Crystal system</b>         | orthorhombic                                                     |         |
| <b>Space group</b>            | P 21 21 21                                                       |         |
| <b>Unit cell dimensions</b>   | a = 6.3347(2) Å                                                  | α = 90° |
|                               | b = 12.7819(4) Å                                                 | β = 90° |
|                               | c = 22.8824(7) Å                                                 | γ = 90° |
| <b>Volume</b>                 | 1852.78(10) Å <sup>3</sup>                                       |         |
| <b>Z</b>                      | 4                                                                |         |
| <b>Density (calculated)</b>   | 1.489 g/cm <sup>3</sup>                                          |         |
| <b>Absorption coefficient</b> | 0.234 mm <sup>-1</sup>                                           |         |
| <b>F(000)</b>                 | 880                                                              |         |

**Table 3. Data collection and structure refinement for rds041.**

|                                            |                                                                              |
|--------------------------------------------|------------------------------------------------------------------------------|
| <b>Theta range for data collection</b>     | 1.78 to 27.40°                                                               |
| <b>Index ranges</b>                        | -8<=h<=8, -16<=k<=16, -26<=l<=29                                             |
| <b>Reflections collected</b>               | 27049                                                                        |
| <b>Independent reflections</b>             | 4195 [R(int) = 0.0606]                                                       |
| <b>Coverage of independent reflections</b> | 99.6%                                                                        |
| <b>Absorption correction</b>               | multi-scan                                                                   |
| <b>Max. and min. transmission</b>          | 0.7455 and 0.6387                                                            |
| <b>Structure solution technique</b>        | direct methods                                                               |
| <b>Structure solution program</b>          | SHELXS-97 (Sheldrick, 2008)                                                  |
| <b>Refinement method</b>                   | Full-matrix least-squares on F <sup>2</sup>                                  |
| <b>Refinement program</b>                  | XL, G.M. Sheldrick, Acta Cryst. (2008). A64, 112-122                         |
| <b>Function minimized</b>                  | Σ w(F <sub>o</sub> <sup>2</sup> - F <sub>c</sub> <sup>2</sup> ) <sup>2</sup> |
| <b>Data / restraints / parameters</b>      | 4195 / 0 / 250                                                               |

|                                            |                                                                                     |                           |
|--------------------------------------------|-------------------------------------------------------------------------------------|---------------------------|
| <b>Goodness-of-fit on <math>F^2</math></b> | 1.024                                                                               |                           |
| $\Delta/\sigma_{\max}$                     | 0.001                                                                               |                           |
| <b>Final R indices</b>                     | 3755 data; $I > 2\sigma(I)$                                                         | R1 = 0.0303, wR2 = 0.0676 |
|                                            | all data                                                                            | R1 = 0.0379, wR2 = 0.0708 |
| <b>Weighting scheme</b>                    | $w = 1/[\sigma^2(F_o^2) + (0.0372P)^2 + 0.2708P]$<br>where $P = (F_o^2 + 2F_c^2)/3$ |                           |
| <b>Absolute structure parameter</b>        | -0.0(1)                                                                             |                           |
| <b>Largest diff. peak and hole</b>         | 0.286 and -0.278 $e\text{\AA}^{-3}$                                                 |                           |
| <b>R.M.S. deviation from mean</b>          | 0.046 $e\text{\AA}^{-3}$                                                            |                           |

**Table 4. Atomic coordinates and equivalent isotropic atomic displacement parameters ( $\text{\AA}^2$ ) for rds041.**

U(eq) is defined as one third of the trace of the orthogonalized  $U_{ij}$  tensor.

|     | x/a         | y/b         | z/c          | U(eq)      |
|-----|-------------|-------------|--------------|------------|
| S1  | 0.57368(7)  | 0.28632(3)  | 0.593476(18) | 0.01258(9) |
| F1  | 0.65601(17) | 0.61596(9)  | 0.50106(5)   | 0.0254(3)  |
| F2  | 0.81001(18) | 0.74054(8)  | 0.54991(5)   | 0.0229(3)  |
| O2  | 0.3185(2)   | 0.46397(11) | 0.46531(5)   | 0.0177(3)  |
| O1  | 0.0331(2)   | 0.52411(11) | 0.41729(5)   | 0.0217(3)  |
| O3  | 0.8412(2)   | 0.54708(10) | 0.60399(5)   | 0.0166(3)  |
| O4  | 0.5022(2)   | 0.23812(10) | 0.53919(5)   | 0.0178(3)  |
| O5  | 0.79407(19) | 0.26702(10) | 0.60725(5)   | 0.0173(3)  |
| O6  | 0.52121(18) | 0.39834(9)  | 0.59501(5)   | 0.0151(3)  |
| O7  | 0.1456(2)   | 0.39524(11) | 0.68299(5)   | 0.0190(3)  |
| N1  | 0.1034(2)   | 0.39000(12) | 0.55284(6)   | 0.0134(3)  |
| C6  | 0.1709(3)   | 0.61763(15) | 0.57648(8)   | 0.0175(4)  |
| C3  | 0.9634(3)   | 0.57184(14) | 0.55446(7)   | 0.0137(4)  |
| C2  | 0.9961(3)   | 0.47109(14) | 0.51737(7)   | 0.0129(3)  |
| C1  | 0.1164(3)   | 0.48935(14) | 0.46034(7)   | 0.0145(4)  |
| C5  | 0.4438(3)   | 0.47617(16) | 0.41256(8)   | 0.0223(4)  |
| C4  | 0.8488(3)   | 0.65310(15) | 0.51709(8)   | 0.0176(4)  |
| C15 | 0.5328(3)   | 0.10401(16) | 0.76838(8)   | 0.0212(4)  |
| C14 | 0.3674(3)   | 0.18913(14) | 0.75983(7)   | 0.0152(4)  |
| C8  | 0.4204(3)   | 0.26782(13) | 0.70934(7)   | 0.0126(3)  |
| C7  | 0.4188(3)   | 0.22209(14) | 0.64789(7)   | 0.0131(3)  |
| C11 | 0.3733(3)   | 0.27457(15) | 0.80815(7)   | 0.0172(4)  |

|     | x/a       | y/b         | z/c        | U(eq)     |
|-----|-----------|-------------|------------|-----------|
| C12 | 0.5950(3) | 0.32275(16) | 0.79960(7) | 0.0184(4) |
| C13 | 0.6246(3) | 0.32071(14) | 0.73215(7) | 0.0146(4) |
| C10 | 0.2149(3) | 0.35560(16) | 0.78572(7) | 0.0192(4) |
| C9  | 0.2456(3) | 0.34845(14) | 0.71963(7) | 0.0134(4) |
| C16 | 0.1525(3) | 0.13542(16) | 0.75224(8) | 0.0197(4) |

**Table 5. Bond lengths (Å) for rds041.**

|          |            |          |            |
|----------|------------|----------|------------|
| S1-O4    | 1.4585(12) | S1-O5    | 1.4523(13) |
| S1-O6    | 1.4704(13) | S1-C7    | 1.7852(17) |
| F1-C4    | 1.361(2)   | F2-C4    | 1.369(2)   |
| O2-C1    | 1.326(2)   | O2-C5    | 1.453(2)   |
| O1-C1    | 1.202(2)   | O3-H3    | 0.84       |
| O3-C3    | 1.409(2)   | O7-C9    | 1.209(2)   |
| N1-H1A   | 0.91       | N1-H1B   | 0.91       |
| N1-H1C   | 0.91       | N1-C2    | 1.482(2)   |
| C6-H6A   | 0.98       | C6-H6B   | 0.98       |
| C6-H6C   | 0.98       | C6-C3    | 1.524(2)   |
| C3-C2    | 1.556(2)   | C3-C4    | 1.529(3)   |
| C2-H2    | 1.0        | C2-C1    | 1.529(2)   |
| C5-H5A   | 0.98       | C5-H5B   | 0.98       |
| C5-H5C   | 0.98       | C4-H4    | 1.0        |
| C15-H15A | 0.98       | C15-H15B | 0.98       |
| C15-H15C | 0.98       | C15-C14  | 1.523(3)   |
| C14-C8   | 1.568(2)   | C14-C11  | 1.555(3)   |
| C14-C16  | 1.535(3)   | C8-C7    | 1.523(2)   |
| C8-C13   | 1.550(2)   | C8-C9    | 1.531(2)   |
| C7-H7A   | 0.99       | C7-H7B   | 0.99       |
| C11-H11  | 1.0        | C11-C12  | 1.545(2)   |
| C11-C10  | 1.531(3)   | C12-H12A | 0.99       |
| C12-H12B | 0.99       | C12-C13  | 1.555(2)   |
| C13-H13A | 0.99       | C13-H13B | 0.99       |
| C10-H10A | 0.99       | C10-H10B | 0.99       |
| C10-C9   | 1.527(2)   | C16-H16A | 0.98       |
| C16-H16B | 0.98       | C16-H16C | 0.98       |

**Table 6. Bond angles (°) for rds041.**

|               |            |               |            |
|---------------|------------|---------------|------------|
| O4-S1-O6      | 111.19(8)  | O4-S1-C7      | 103.25(8)  |
| O5-S1-O4      | 114.29(8)  | O5-S1-O6      | 112.18(7)  |
| O5-S1-C7      | 107.39(8)  | O6-S1-C7      | 107.88(8)  |
| C1-O2-C5      | 115.47(14) | C3-O3-H3      | 109.5      |
| H1A-N1-H1B    | 109.5      | H1A-N1-H1C    | 109.5      |
| H1B-N1-H1C    | 109.5      | C2-N1-H1A     | 109.5      |
| C2-N1-H1B     | 109.5      | C2-N1-H1C     | 109.5      |
| H6A-C6-H6B    | 109.5      | H6A-C6-H6C    | 109.5      |
| H6B-C6-H6C    | 109.5      | C3-C6-H6A     | 109.5      |
| C3-C6-H6B     | 109.5      | C3-C6-H6C     | 109.5      |
| O3-C3-C6      | 107.13(13) | O3-C3-C2      | 109.02(14) |
| O3-C3-C4      | 109.96(14) | C6-C3-C2      | 112.55(15) |
| C6-C3-C4      | 109.49(15) | C4-C3-C2      | 108.67(13) |
| N1-C2-C3      | 109.94(13) | N1-C2-H2      | 107.5      |
| N1-C2-C1      | 110.22(14) | C3-C2-H2      | 107.5      |
| C1-C2-C3      | 113.91(15) | C1-C2-H2      | 107.5      |
| O2-C1-C2      | 111.77(14) | O1-C1-O2      | 125.74(16) |
| O1-C1-C2      | 122.48(16) | O2-C5-H5A     | 109.5      |
| O2-C5-H5B     | 109.5      | O2-C5-H5C     | 109.5      |
| H5A-C5-H5B    | 109.5      | H5A-C5-H5C    | 109.5      |
| H5B-C5-H5C    | 109.5      | F1-C4-F2      | 105.76(15) |
| F1-C4-C3      | 109.88(15) | F1-C4-H4      | 110.5      |
| F2-C4-C3      | 109.45(14) | F2-C4-H4      | 110.5      |
| C3-C4-H4      | 110.5      | H15A-C15-H15B | 109.5      |
| H15A-C15-H15C | 109.5      | H15B-C15-H15C | 109.5      |
| C14-C15-H15A  | 109.5      | C14-C15-H15B  | 109.5      |
| C14-C15-H15C  | 109.5      | C15-C14-C8    | 113.93(15) |
| C15-C14-C11   | 113.20(15) | C15-C14-C16   | 107.79(15) |
| C11-C14-C8    | 93.91(13)  | C16-C14-C8    | 113.15(14) |
| C16-C14-C11   | 114.59(14) | C7-C8-C14     | 115.64(14) |
| C7-C8-C13     | 118.93(15) | C7-C8-C9      | 113.32(14) |
| C13-C8-C14    | 102.13(13) | C9-C8-C14     | 99.43(13)  |
| C9-C8-C13     | 104.96(13) | S1-C7-H7A     | 107.9      |
| S1-C7-H7B     | 107.9      | C8-C7-S1      | 117.64(12) |
| C8-C7-H7A     | 107.9      | C8-C7-H7B     | 107.9      |
| H7A-C7-H7B    | 107.2      | C14-C11-H11   | 114.6      |
| C12-C11-C14   | 102.23(13) | C12-C11-H11   | 114.6      |
| C10-C11-C14   | 102.77(14) | C10-C11-H11   | 114.6      |
| C10-C11-C12   | 106.48(16) | C11-C12-H12A  | 111.1      |

|               |            |               |            |
|---------------|------------|---------------|------------|
| C11-C12-H12B  | 111.1      | C11-C12-C13   | 103.21(14) |
| H12A-C12-H12B | 109.1      | C13-C12-H12A  | 111.1      |
| C13-C12-H12B  | 111.1      | C8-C13-C12    | 103.94(14) |
| C8-C13-H13A   | 111.0      | C8-C13-H13B   | 111.0      |
| C12-C13-H13A  | 111.0      | C12-C13-H13B  | 111.0      |
| H13A-C13-H13B | 109.0      | C11-C10-H10A  | 111.4      |
| C11-C10-H10B  | 111.4      | H10A-C10-H10B | 109.2      |
| C9-C10-C11    | 101.99(14) | C9-C10-H10A   | 111.4      |
| C9-C10-H10B   | 111.4      | O7-C9-C8      | 127.24(15) |
| O7-C9-C10     | 126.17(16) | C10-C9-C8     | 106.55(14) |
| C14-C16-H16A  | 109.5      | C14-C16-H16B  | 109.5      |
| C14-C16-H16C  | 109.5      | H16A-C16-H16B | 109.5      |
| H16A-C16-H16C | 109.5      | H16B-C16-H16C | 109.5      |

**Table 7. Anisotropic atomic displacement parameters ( $\text{\AA}^2$ ) for rds041.**

The anisotropic atomic displacement factor exponent takes the form:  $-2\pi^2 [ h^2 a^{*2} U_{11} + \dots + 2 h k a^* b^* U_{12} ]$

|     | $U_{11}$    | $U_{22}$   | $U_{33}$    | $U_{23}$     | $U_{13}$    | $U_{12}$     |
|-----|-------------|------------|-------------|--------------|-------------|--------------|
| S1  | 0.01235(18) | 0.0137(2)  | 0.01169(17) | -0.00052(16) | 0.00151(16) | -0.00043(17) |
| F1  | 0.0186(5)   | 0.0249(6)  | 0.0328(6)   | -0.0004(5)   | -0.0080(5)  | 0.0038(5)    |
| F2  | 0.0290(6)   | 0.0152(6)  | 0.0245(5)   | -0.0017(4)   | 0.0033(5)   | 0.0054(5)    |
| O2  | 0.0152(6)   | 0.0237(7)  | 0.0144(6)   | 0.0014(5)    | 0.0024(5)   | -0.0016(6)   |
| O1  | 0.0252(7)   | 0.0261(8)  | 0.0139(6)   | 0.0034(5)    | -0.0014(5)  | 0.0049(6)    |
| O3  | 0.0185(6)   | 0.0180(7)  | 0.0133(6)   | -0.0014(5)   | 0.0028(5)   | -0.0035(5)   |
| O4  | 0.0201(6)   | 0.0196(7)  | 0.0138(6)   | -0.0039(5)   | 0.0017(5)   | -0.0019(5)   |
| O5  | 0.0130(6)   | 0.0200(7)  | 0.0188(6)   | 0.0009(5)    | 0.0039(5)   | 0.0020(5)    |
| O6  | 0.0144(6)   | 0.0125(6)  | 0.0184(6)   | 0.0008(5)    | -0.0002(5)  | -0.0005(5)   |
| O7  | 0.0162(6)   | 0.0209(7)  | 0.0199(6)   | 0.0024(5)    | -0.0005(5)  | 0.0034(6)    |
| N1  | 0.0133(7)   | 0.0134(8)  | 0.0136(6)   | 0.0004(6)    | 0.0009(6)   | 0.0012(6)    |
| C6  | 0.0161(9)   | 0.0168(9)  | 0.0196(9)   | -0.0029(7)   | -0.0022(7)  | -0.0023(8)   |
| C3  | 0.0160(9)   | 0.0124(9)  | 0.0126(8)   | -0.0016(7)   | 0.0009(7)   | -0.0009(7)   |
| C2  | 0.0119(8)   | 0.0134(9)  | 0.0133(8)   | 0.0000(7)    | -0.0016(6)  | 0.0002(7)    |
| C1  | 0.0197(10)  | 0.0105(9)  | 0.0131(8)   | -0.0020(6)   | -0.0003(7)  | -0.0021(7)   |
| C5  | 0.0199(9)   | 0.0308(11) | 0.0160(8)   | 0.0004(8)    | 0.0045(8)   | -0.0049(9)   |
| C4  | 0.0175(9)   | 0.0163(9)  | 0.0191(8)   | -0.0008(7)   | -0.0002(7)  | 0.0019(8)    |
| C15 | 0.0210(10)  | 0.0179(10) | 0.0248(9)   | 0.0066(8)    | -0.0015(8)  | -0.0004(8)   |
| C14 | 0.0131(9)   | 0.0168(9)  | 0.0158(8)   | 0.0040(7)    | -0.0007(6)  | 0.0000(7)    |
| C8  | 0.0135(8)   | 0.0127(9)  | 0.0115(7)   | 0.0002(6)    | -0.0001(6)  | -0.0007(7)   |
| C7  | 0.0128(8)   | 0.0111(8)  | 0.0153(7)   | -0.0009(7)   | 0.0022(7)   | -0.0023(8)   |
| C11 | 0.0178(9)   | 0.0226(10) | 0.0112(7)   | 0.0026(7)    | 0.0022(6)   | -0.0017(8)   |

|     | $U_{11}$   | $U_{22}$   | $U_{33}$  | $U_{23}$   | $U_{13}$   | $U_{12}$   |
|-----|------------|------------|-----------|------------|------------|------------|
| C12 | 0.0177(9)  | 0.0226(10) | 0.0149(8) | -0.0010(7) | -0.0020(7) | -0.0027(8) |
| C13 | 0.0127(9)  | 0.0154(9)  | 0.0156(8) | 0.0007(7)  | 0.0002(6)  | -0.0014(7) |
| C10 | 0.0181(10) | 0.0228(11) | 0.0168(8) | -0.0023(7) | 0.0042(7)  | 0.0020(8)  |
| C9  | 0.0124(8)  | 0.0125(9)  | 0.0154(8) | -0.0007(7) | 0.0012(7)  | -0.0029(7) |
| C16 | 0.0174(9)  | 0.0210(10) | 0.0206(9) | 0.0046(8)  | 0.0002(7)  | -0.0014(8) |

**Table 8. Hydrogen atomic coordinates and isotropic atomic displacement parameters ( $\text{\AA}^2$ ) for rds041.**

|      | x/a     | y/b    | z/c    | U(eq) |
|------|---------|--------|--------|-------|
| H3   | -0.2563 | 0.5060 | 0.5944 | 0.025 |
| H1A  | 0.1090  | 0.3291 | 0.5323 | 0.02  |
| H1B  | 0.0303  | 0.3796 | 0.5866 | 0.02  |
| H1C  | 0.2368  | 0.4115 | 0.5614 | 0.02  |
| H6A  | 0.1432  | 0.6835 | 0.5970 | 0.026 |
| H6B  | 0.2650  | 0.6307 | 0.5433 | 0.026 |
| H6C  | 0.2381  | 0.5681 | 0.6034 | 0.026 |
| H2   | -0.1469 | 0.4436 | 0.5069 | 0.015 |
| H5A  | 0.3845  | 0.4325 | 0.3814 | 0.033 |
| H5B  | 0.5895  | 0.4546 | 0.4204 | 0.033 |
| H5C  | 0.4418  | 0.5496 | 0.4003 | 0.033 |
| H4   | -0.0655 | 0.6712 | 0.4818 | 0.021 |
| H15A | 0.5015  | 0.0648 | 0.8041 | 0.032 |
| H15B | 0.6728  | 0.1361 | 0.7717 | 0.032 |
| H15C | 0.5306  | 0.0564 | 0.7348 | 0.032 |
| H7A  | 0.2707  | 0.2207 | 0.6341 | 0.016 |
| H7B  | 0.4673  | 0.1486 | 0.6505 | 0.016 |
| H11  | 0.3445  | 0.2483 | 0.8485 | 0.021 |
| H12A | 0.7045  | 0.2803 | 0.8194 | 0.022 |
| H12B | 0.6005  | 0.3952 | 0.8148 | 0.022 |
| H13A | 0.6390  | 0.3925 | 0.7164 | 0.017 |
| H13B | 0.7510  | 0.2796 | 0.7212 | 0.017 |
| H10A | 0.0687  | 0.3372 | 0.7971 | 0.023 |
| H10B | 0.2484  | 0.4265 | 0.8004 | 0.023 |
| H16A | 0.1599  | 0.0857 | 0.7197 | 0.03  |
| H16B | 0.0444  | 0.1883 | 0.7440 | 0.03  |
| H16C | 0.1159  | 0.0980 | 0.7882 | 0.03  |



**Table 9. Hydrogen bond distances (Å) and angles (°) for rds041.**

|                    | Donor-H | Acceptor-H | Donor-Acceptor | Angle |
|--------------------|---------|------------|----------------|-------|
| O3-H3 $\cdots$ O6  | 0.84    | 1.97       | 2.7864(18)     | 163.9 |
| N1-H1A $\cdots$ O4 | 0.91    | 1.97       | 2.7435(19)     | 142.1 |
| N1-H1B $\cdots$ O5 | 0.91    | 2.13       | 2.8036(19)     | 130.1 |
| N1-H1B $\cdots$ O7 | 0.91    | 2.33       | 2.9909(18)     | 129.1 |
| N1-H1C $\cdots$ O6 | 0.91    | 1.97       | 2.8192(19)     | 155.5 |

Figure C. Thermal Ellipsoid plot of rds041 drawn at 50% probability. H atoms on carbon are removed for clarity.

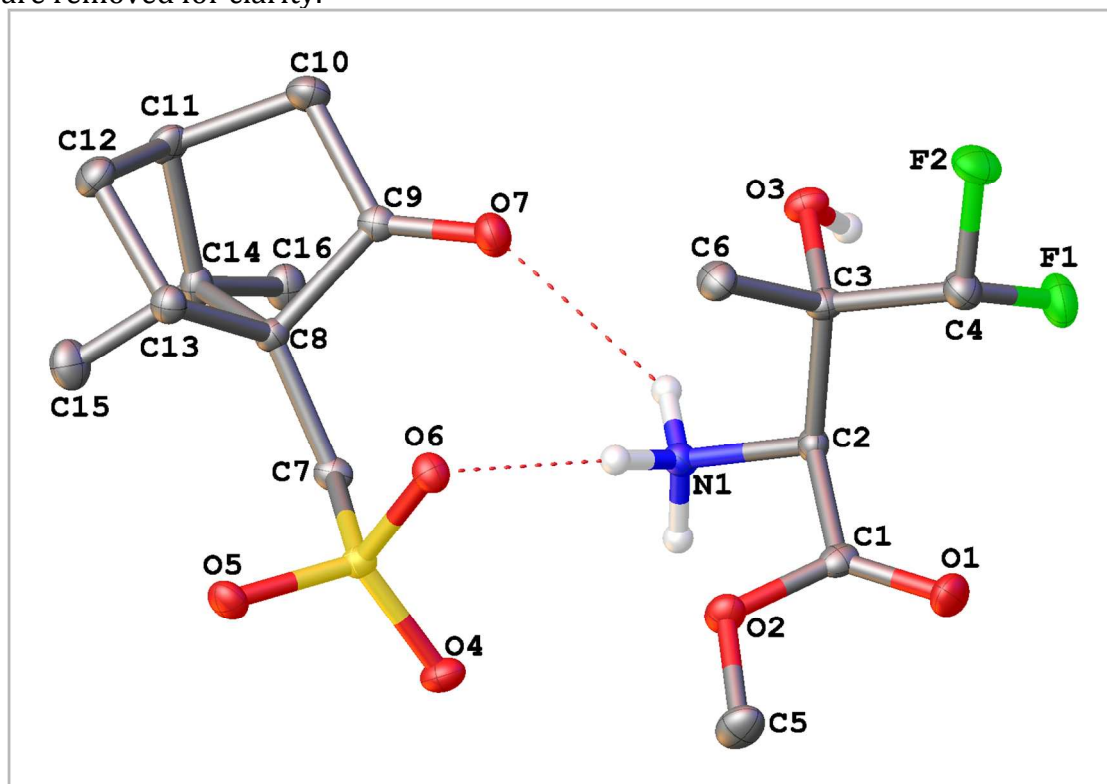

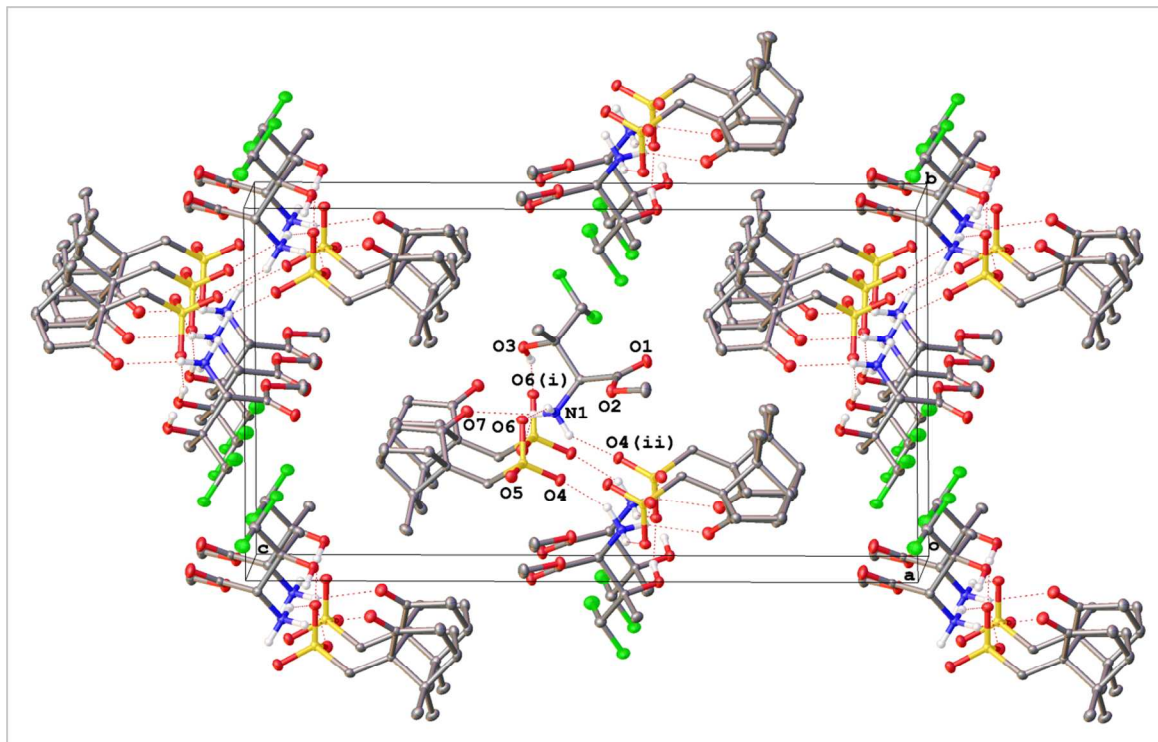

Figure D. Packing diagram of rds041 viewed along a axis of unit cell, showing hydrogen bond interactions with neighboring sulfonate anions . Only hydrogen bond donor and acceptor atoms labeled. Ellipsoids drawn at 50% probability. H atoms on carbon are removed and O5(i) label excluded for clarity. (Symmetry operations i:  $-1+x, y, z$ ; ii:  $1/2 +x, 1/2 -y, 1-z$ )

### Compound 16 <sup>1</sup>H NMR

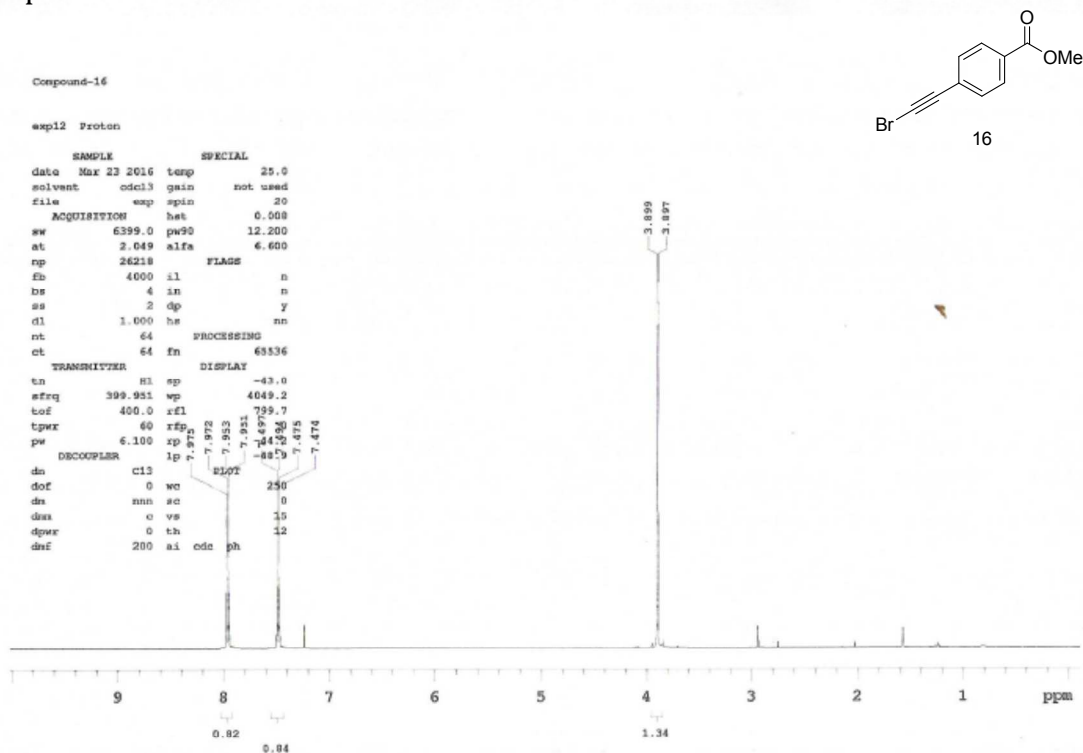

Mixture of diastereomers **19 a & b** (9:1) <sup>1</sup>H NMR

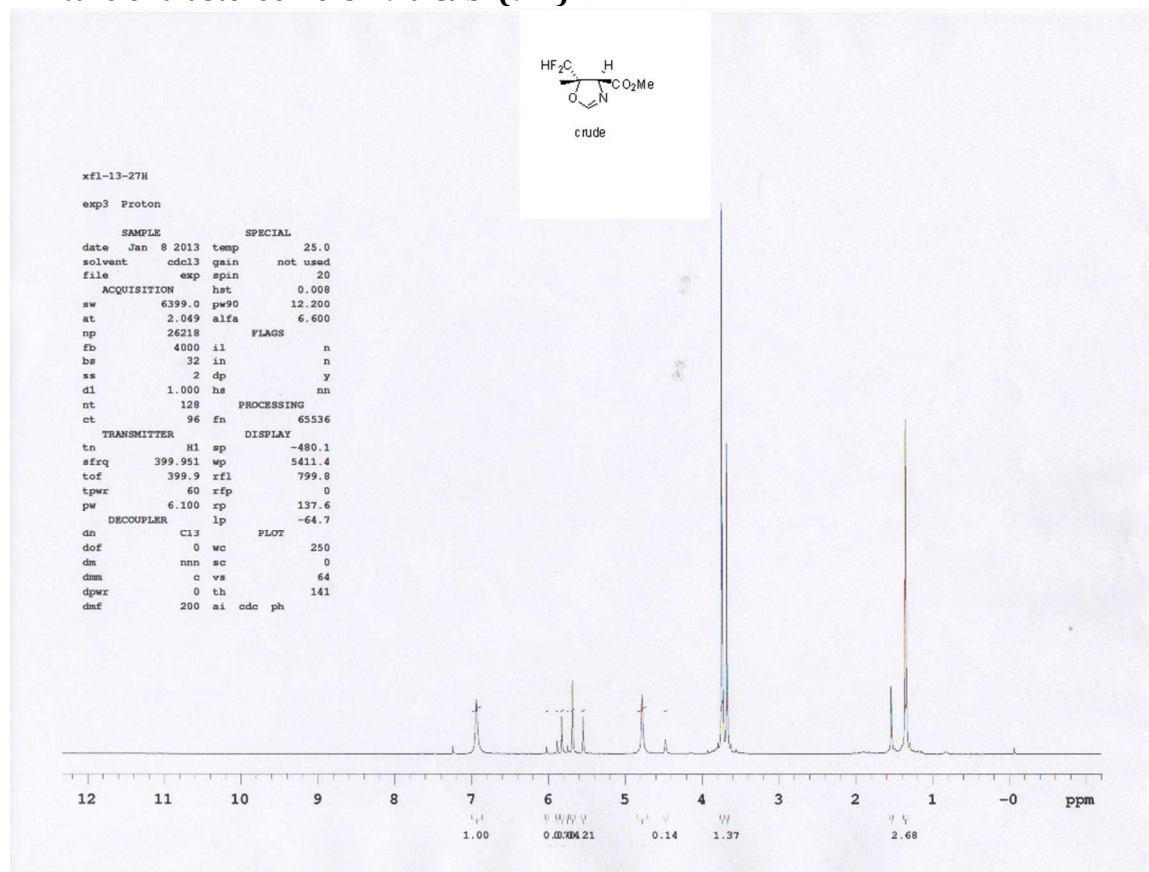

Mixture of diastereomers **19 a & b** (9:1) <sup>13</sup>C NMR

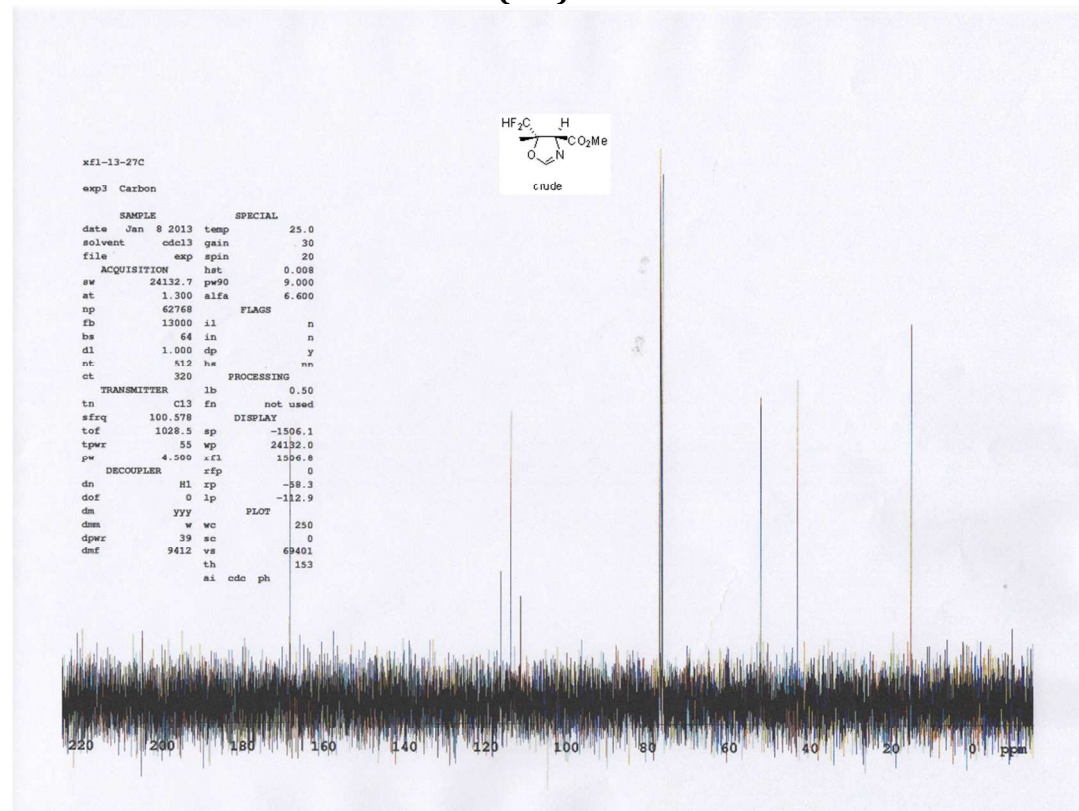

Mixture of diastereomers **19 a & b** (9:1) <sup>19</sup>F NMR

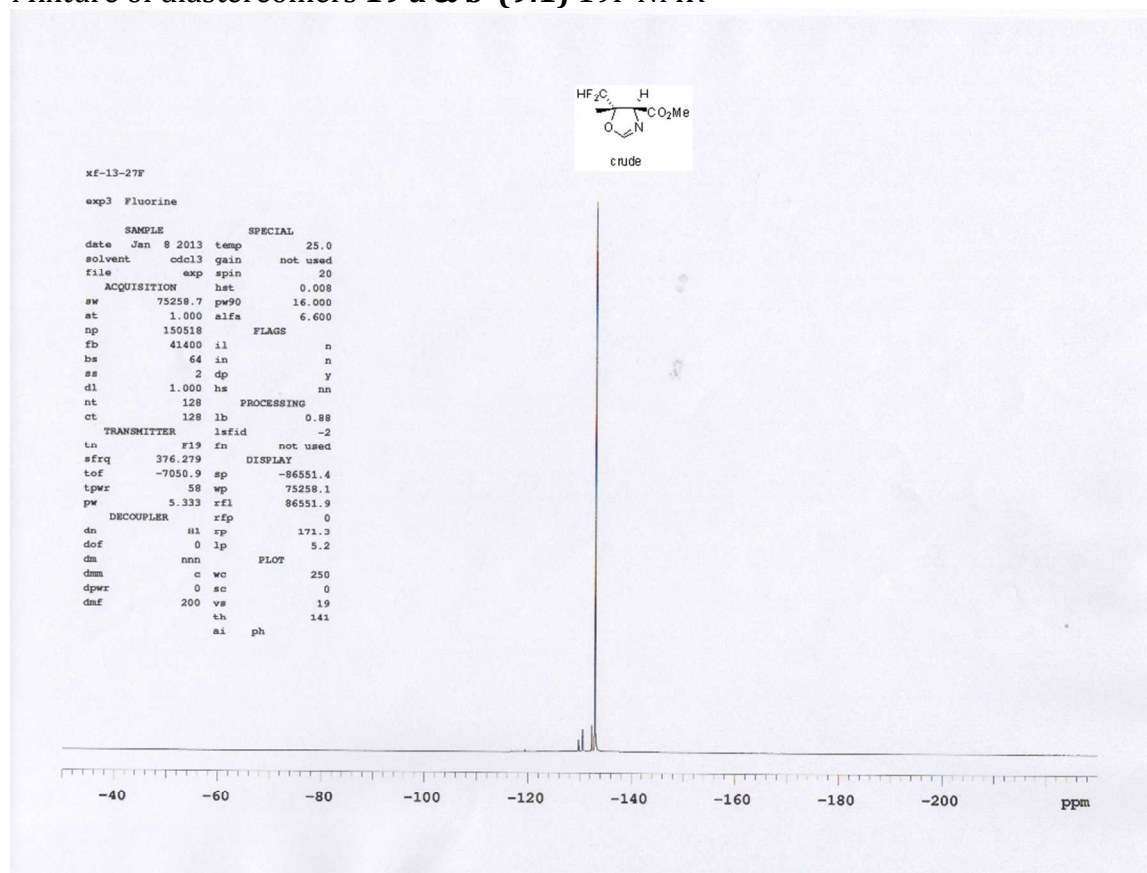

Compound **20a** <sup>1</sup>H NMR

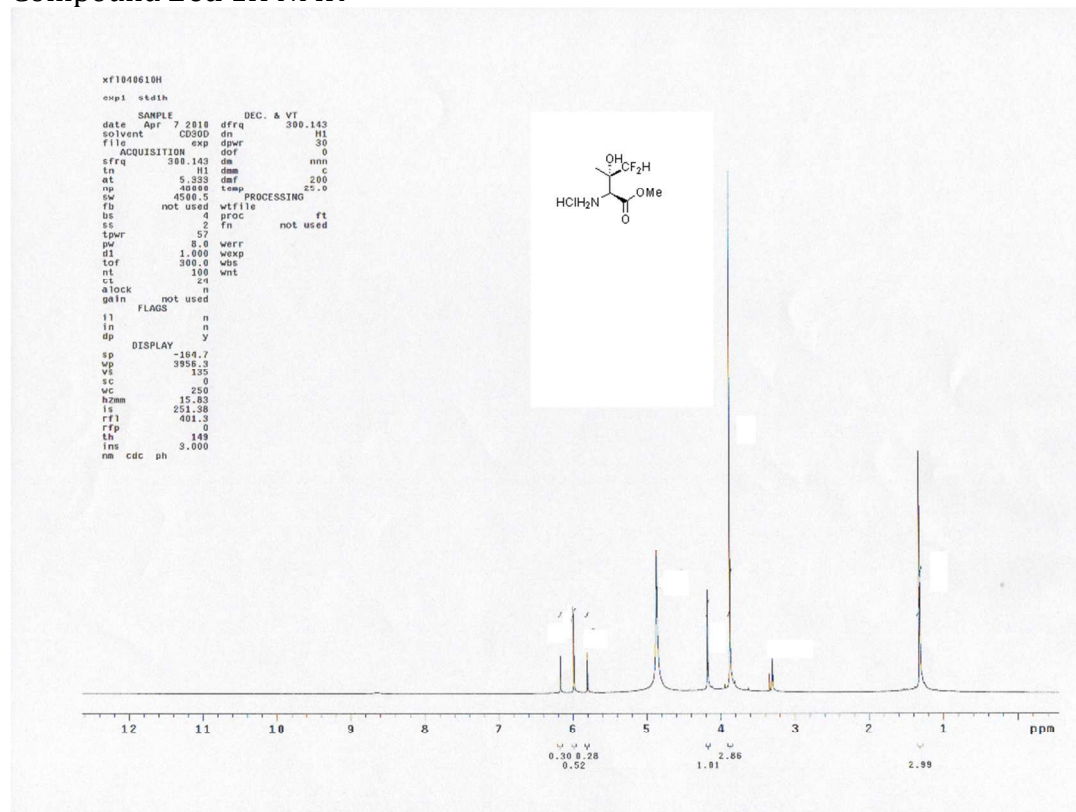

### Compound 20a 19F NMR

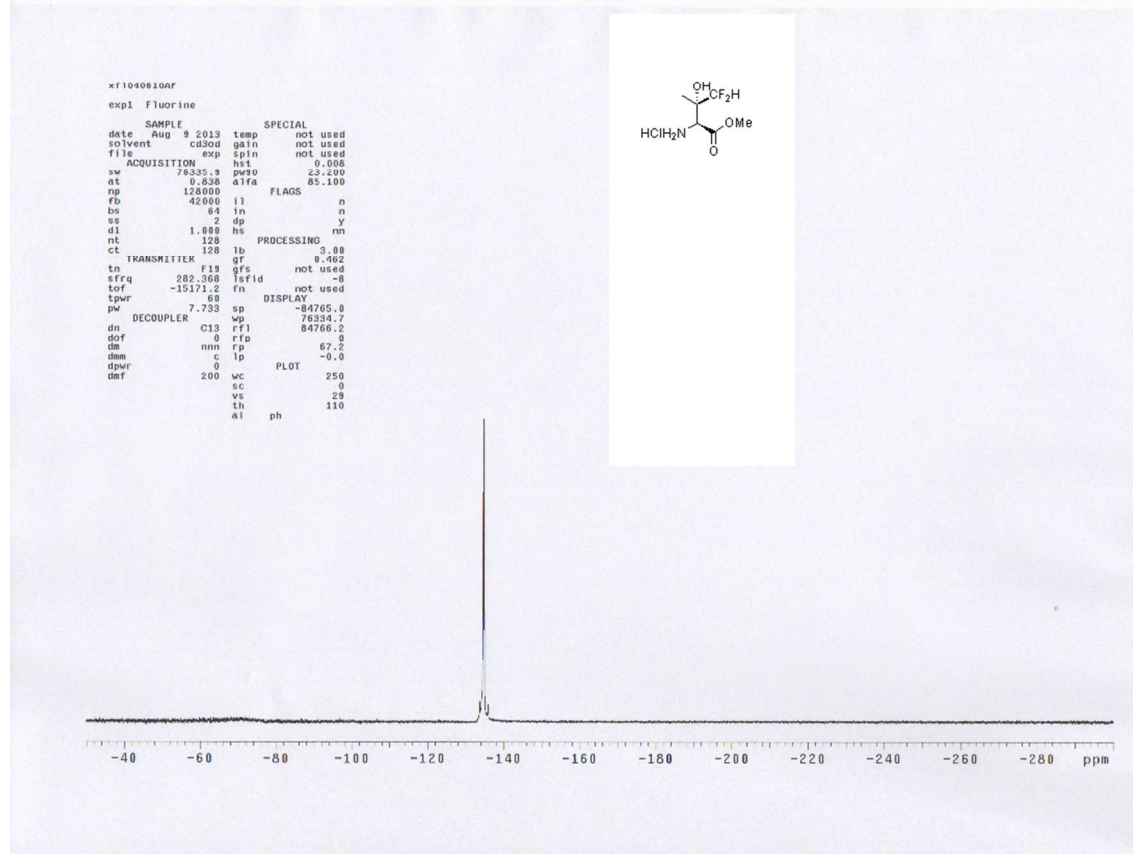

### Compound 20a 13C NMR

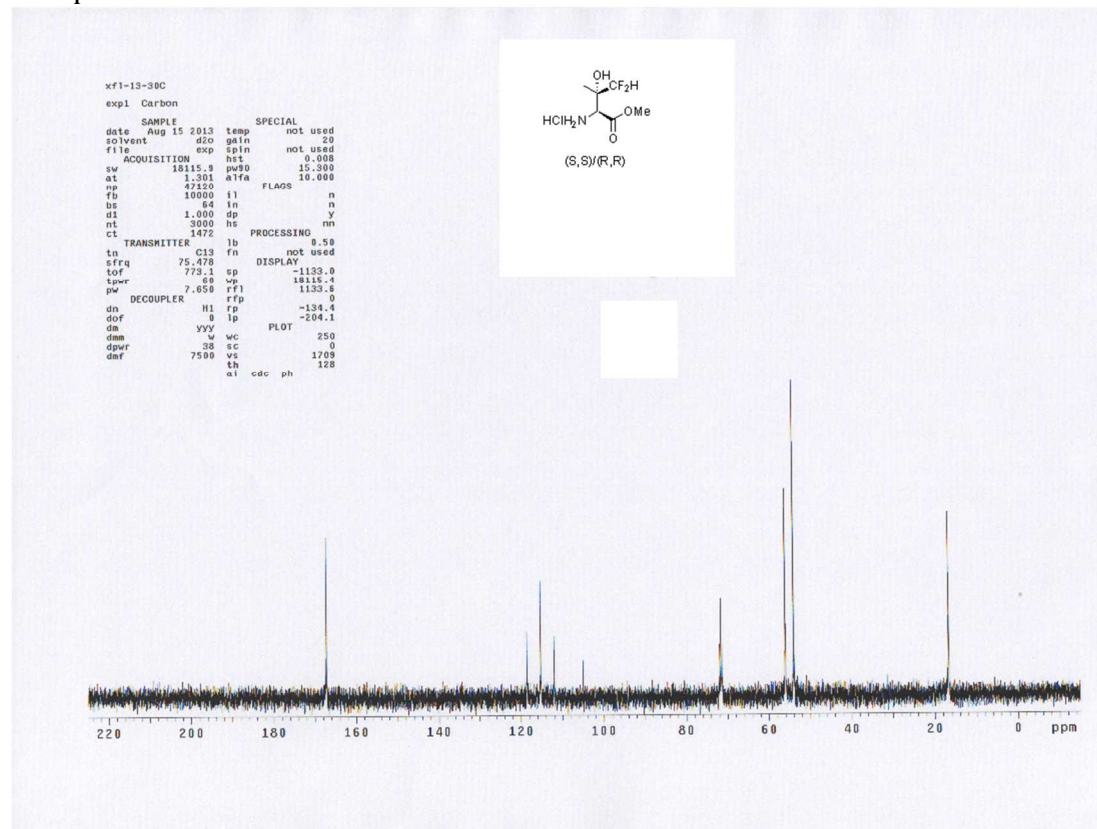

# Compound 21 1H NMR

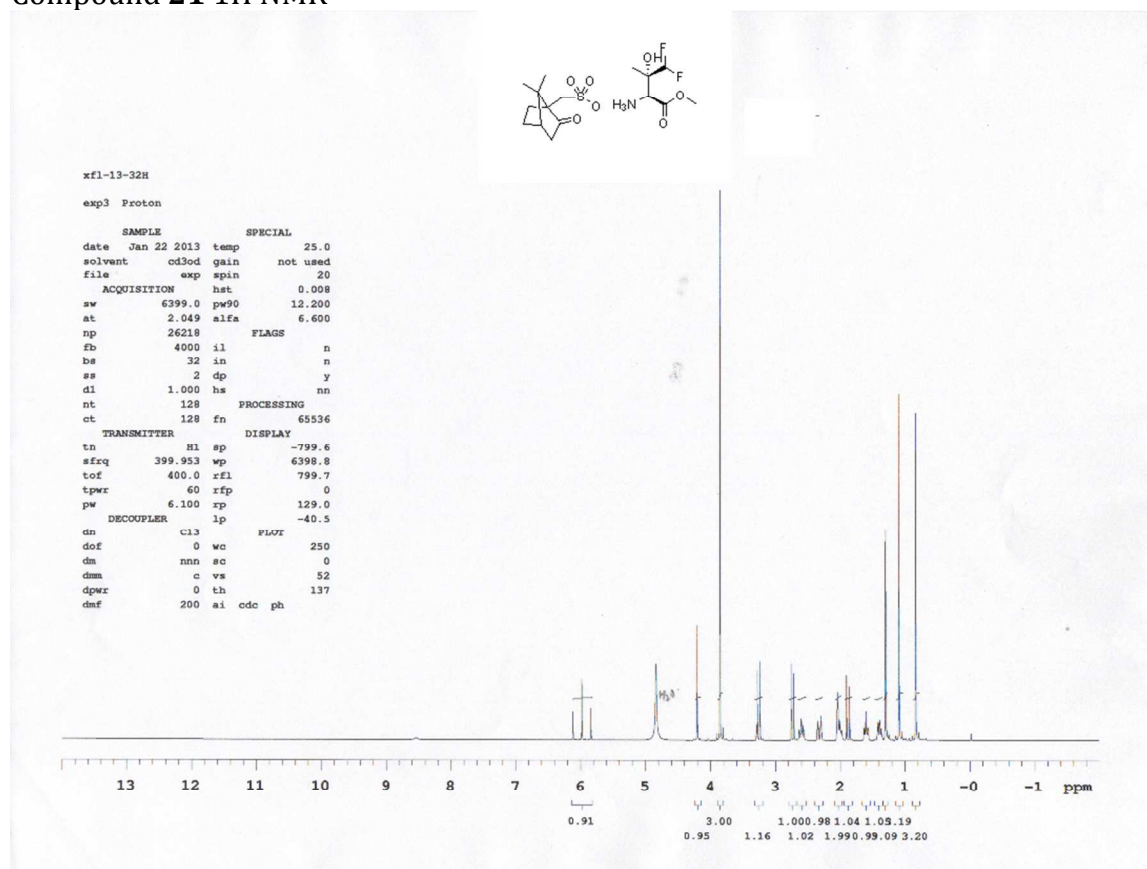

# Compound 21 13C NMR

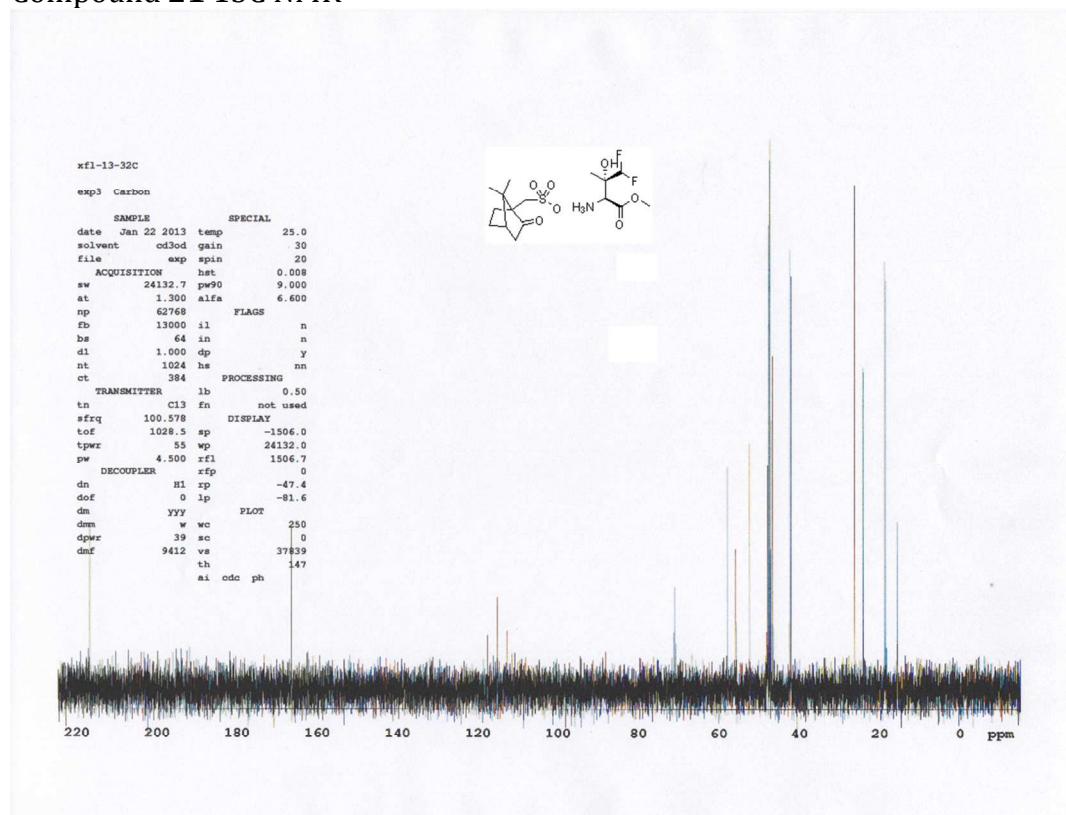

### Compound 21 19F NMR

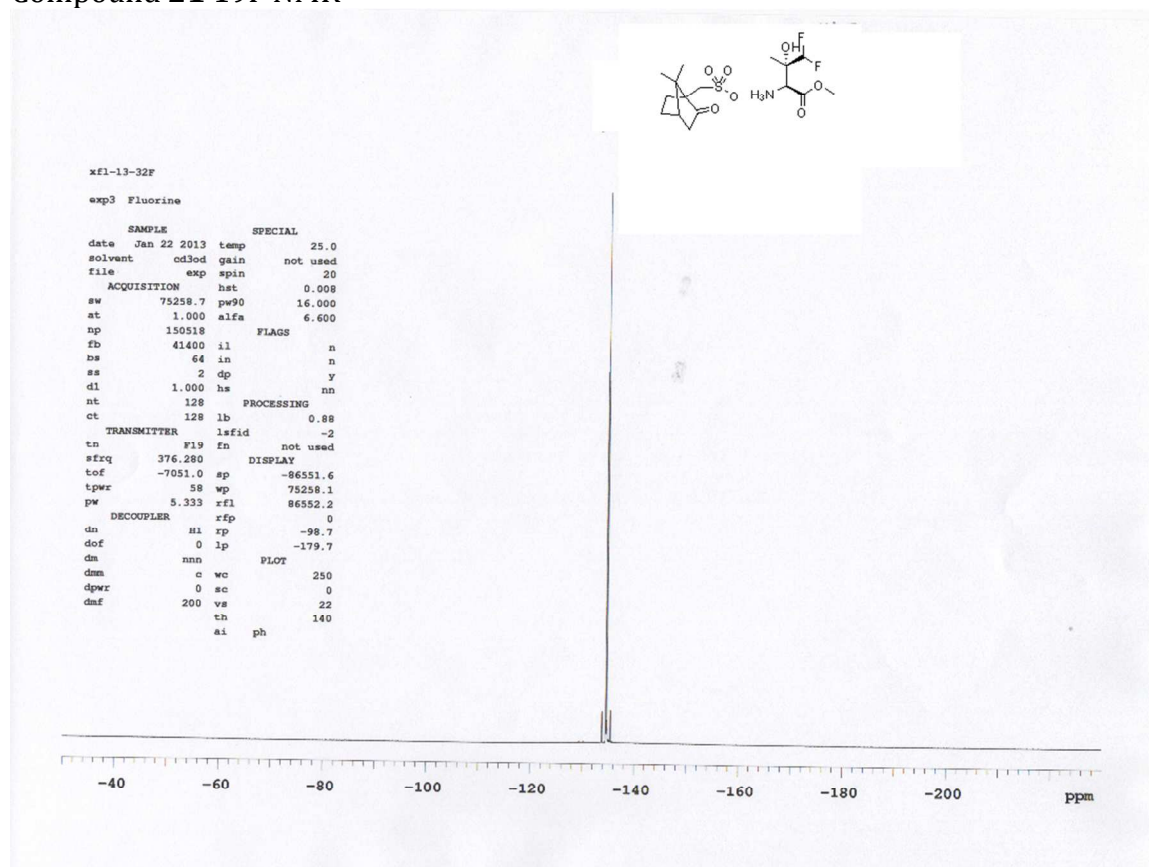

### Compound 12 1H NMR

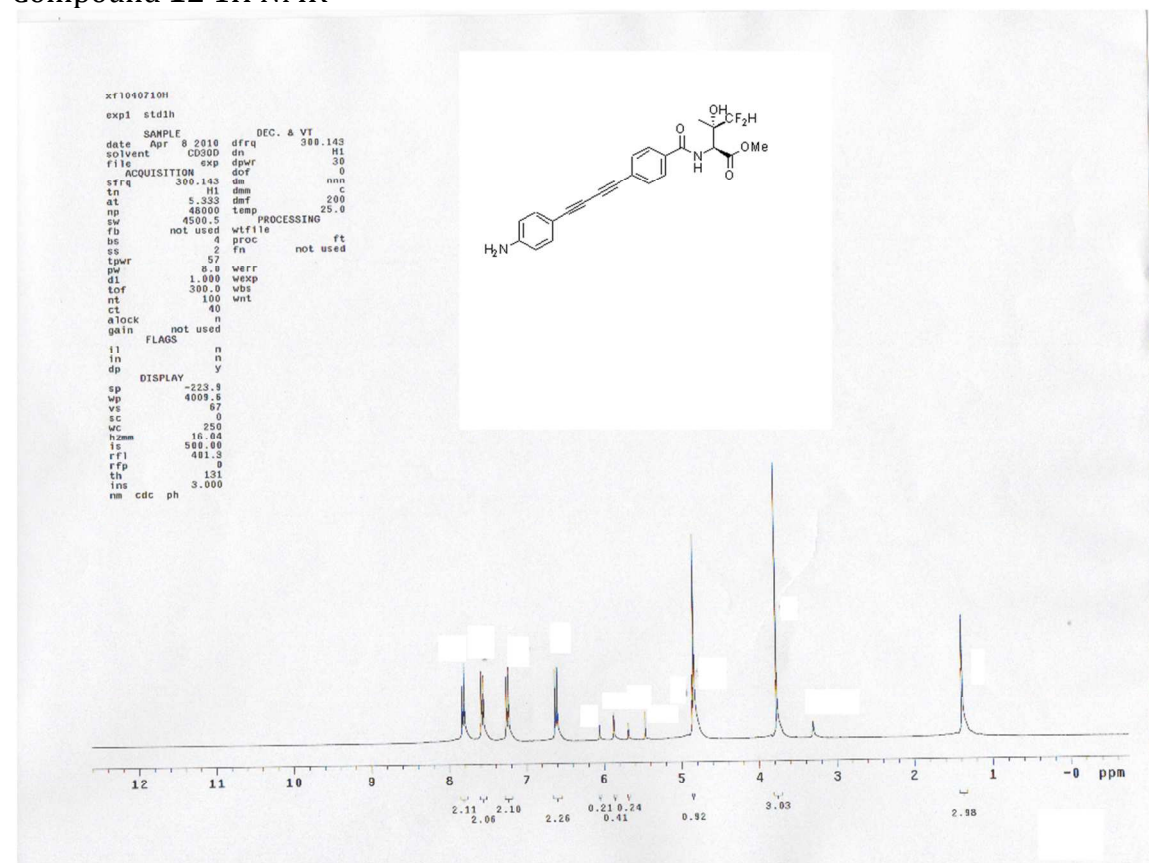

## Compound 12 13C NMR

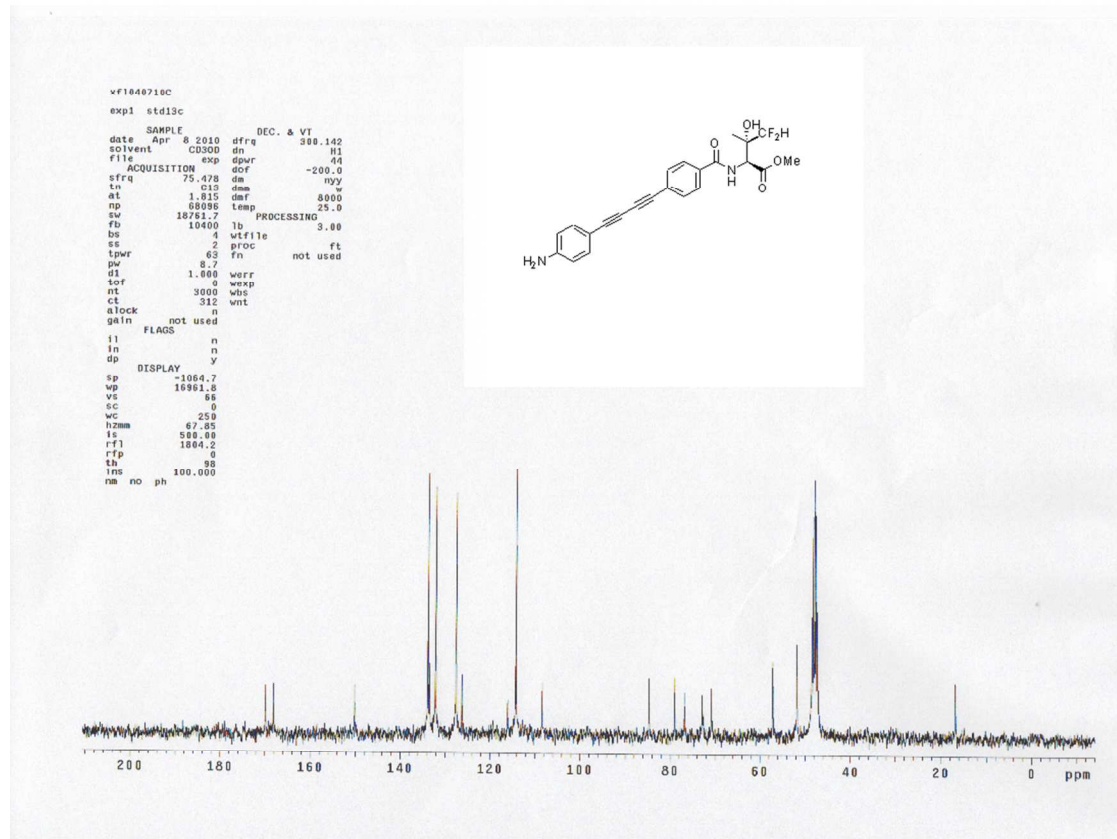

## Compound 12 19F NMR

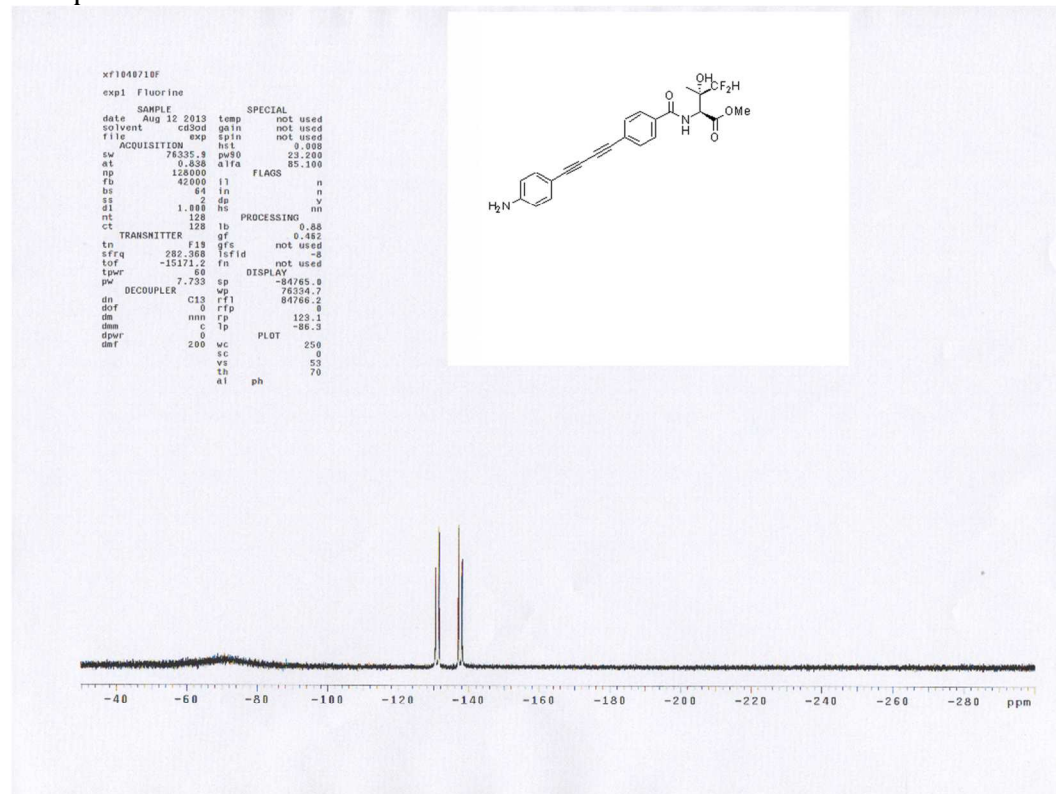



# LPC-058 1H NMR

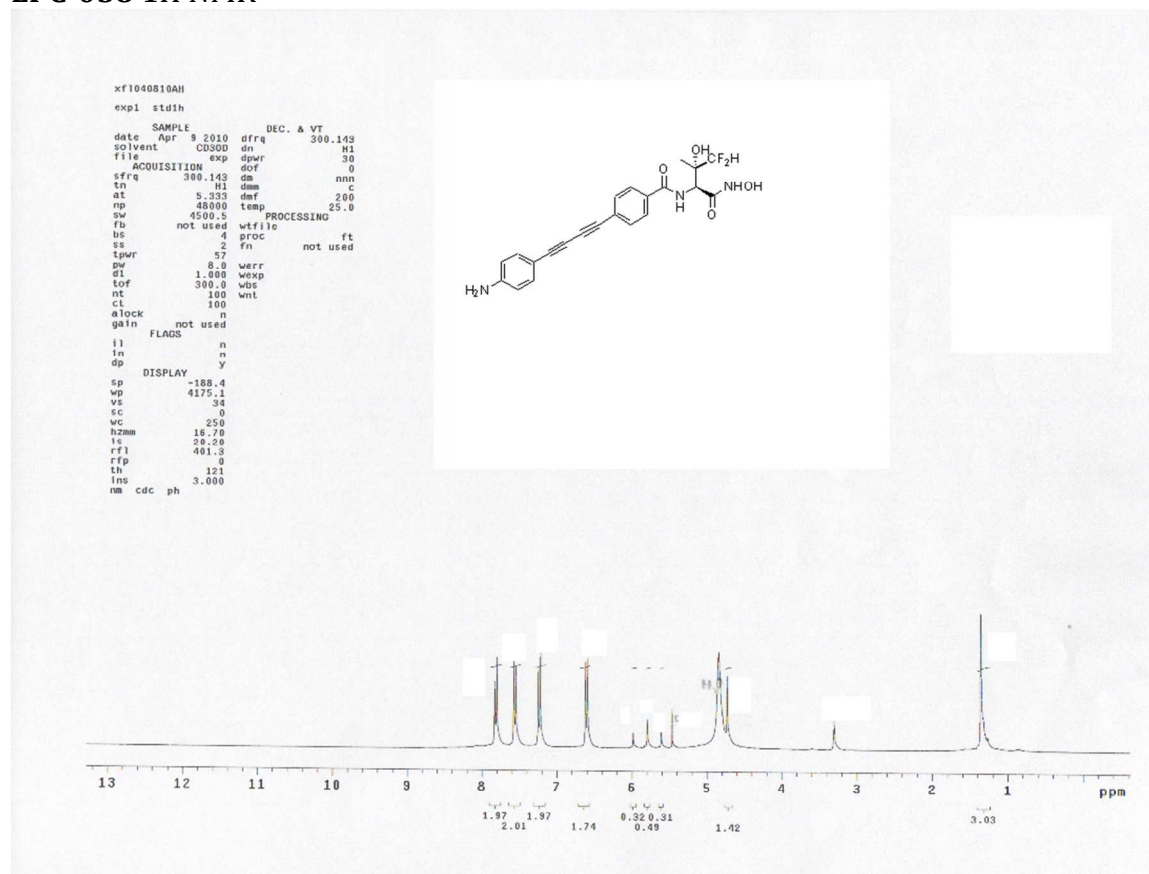

# LPC-058 13C NMR

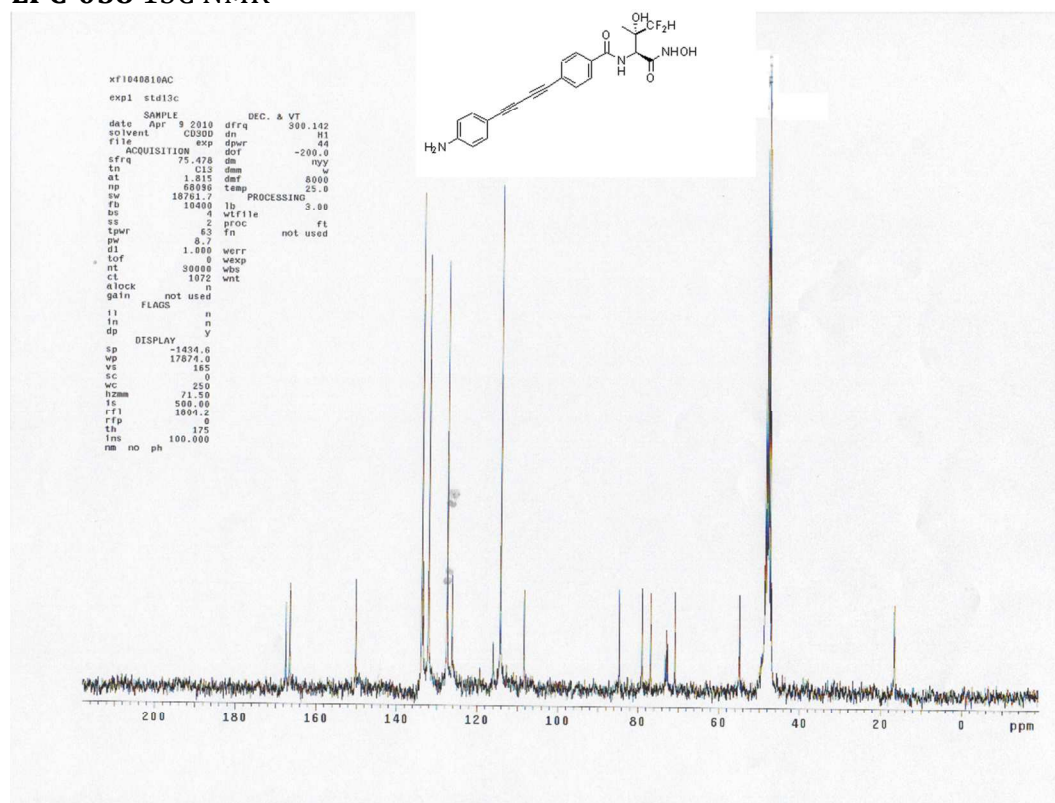

# LPC-058 19F NMR

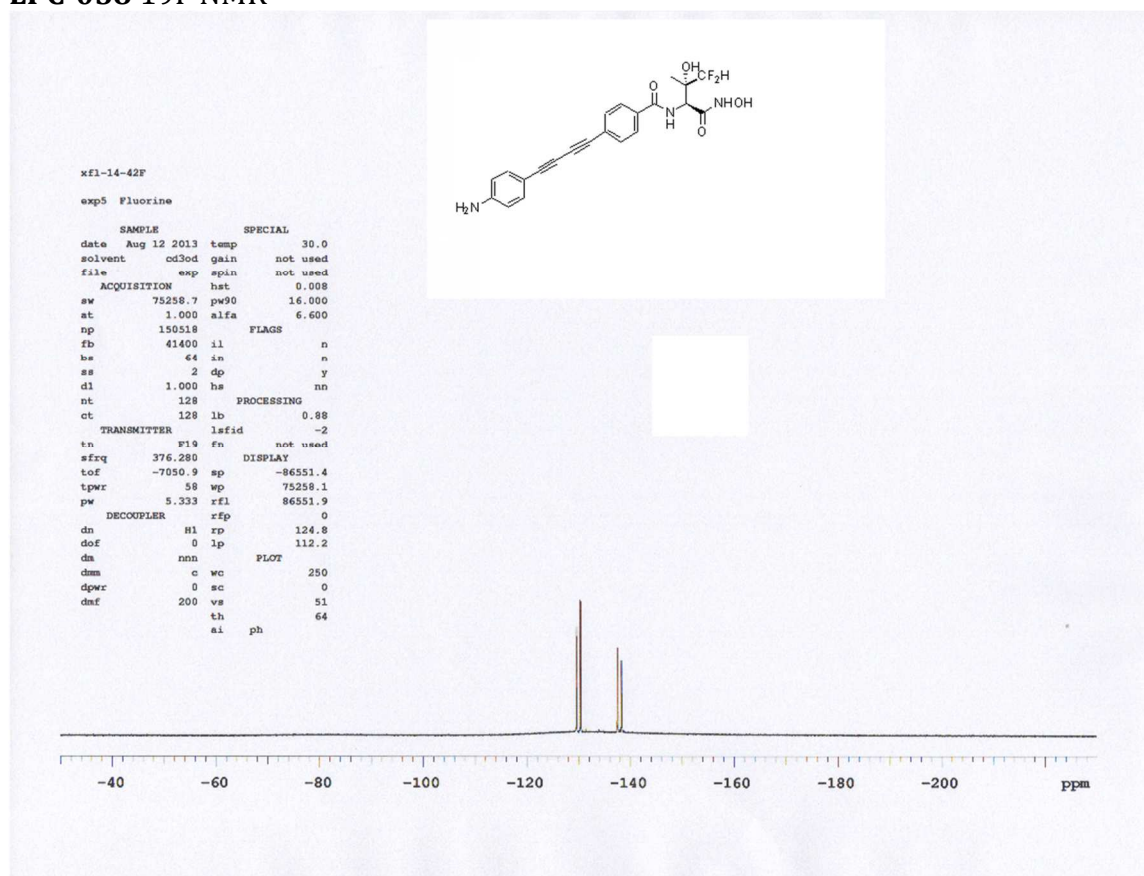

Supplement: NIHMS834621-supplement-Supplemental.pdf [file NIHMS834621-supplement-Supplemental.pdf]
